# Transcriptional memory is conferred by combined heritable maintenance and local removal of selective chromatin modifications

Pawel Mikulski<sup>1,2,†</sup>, Sahar S.H. Tehrani<sup>1,3</sup>, Anna Kogan<sup>1</sup>, Izma Abdul-Zani<sup>1</sup>, Emer Shell<sup>1</sup>, Brent J. Ryan<sup>4</sup> and Lars E.T. Jansen<sup>1\*</sup>

<sup>1</sup>Department of Biochemistry, University of Oxford, Oxford, UK

<sup>2</sup>The International Institute of Molecular Mechanisms and Machines PAS, Warsaw, Poland

<sup>3</sup>Instituto Gulbenkian de Ciência, Oeiras, Portugal

<sup>4</sup>Department of Physiology, Anatomy & Genetics, University of Oxford, Oxford, UK

†Co-corresponding author: [p.mikulski@imol.institute](mailto:p.mikulski@imol.institute)

\*Correspondence: [lars.jansen@bioch.ox.ac.uk](mailto:lars.jansen@bioch.ox.ac.uk) (lead contact)

## Abstract

Interferon- $\gamma$  (IFN $\gamma$ ) transiently activates genes involved in inflammation and innate immunity. A subset of targets maintain a mitotically heritable memory of prior IFN $\gamma$  exposure resulting in hyperactivation upon reexposure. Here we discovered that the active chromatin marks H3K4me1, H3K14Ac and H4K16Ac are established during IFN $\gamma$  priming and selectively maintained on a cluster of GBP genes for at least 7 days in dividing cells in the absence of transcription. The histone acetyltransferase KAT7 is required for the accelerated GBP reactivation upon reexposure to IFN $\gamma$ . In naïve cells, we find the GBP cluster is maintained in low-level repressive chromatin marked by H3K27me3 limiting priming in a PRC2-dependent manner. Unexpectedly, IFN $\gamma$  results in transient accumulation of this repressive mark but is then selectively depleted from primed GBP genes during the memory phase facilitating hyperactivation of primed cells. Furthermore, we identified a cis-regulatory element that makes transient, long-range contacts across the GBP cluster and acts as a repressor, primarily to curb the hyperactivation of previously IFN $\gamma$ -primed cells. Combined our results identify the putative chromatin basis for long-term transcriptional memory of interferon signalling that may contribute to enhanced innate immunity.

## Introduction

Cells exist in a dynamic environment, where they respond to a multitude of stimuli by rewiring their gene expression programmes. While acute transcriptional activation by external signals is well understood, the longer-term cellular consequences of such signals are poorly defined. Cells can maintain a memory of past stimulation that can be inherited for multiple cell generations. Post-stimulus epigenetic memory has been characterized mostly in the context of long-term gene repression. Prominent examples include read-write mechanisms that maintain gene silencing through DNA methylation, repressive histone modifications and Polycomb complex binding<sup>1</sup>. However, transient gene activation can also be memorized, known as long-term transcriptional memory<sup>2</sup>. Such memory of gene activation is relevant as it may alter the cellular response to future reexposure to activating signals.

Despite the existence of transcriptional memory phenomena across multiple cellular processes and species<sup>3</sup>, its molecular principles are obscure and represent an important gap in our understanding of gene expression regulation. Cellular exposure to the cytokine Interferon-gamma (IFN $\gamma$ ) is known to

42 induce transcriptional memory and is an ideal model for discovering the underlying mechanisms. IFN $\gamma$   
43 induces a broad set of genes acting in inflammation, cell death, and host defence to pathogens and  
44 cancer<sup>4</sup>. In addition to the transient activation of a large number of genes, IFN $\gamma$  induces long-term  
45 transcriptional memory of a subset of genes in different cell types, including innate immune  
46 macrophages, non-immune fibroblasts and cancer cells<sup>5-8</sup>. We and others discovered that genes that  
47 display memory tend to reside in genomic clusters<sup>8</sup>. One of these is a clustered family of genes  
48 encoding Guanylate-Binding Proteins (GBPs), GTPases that are crucial for inflammasome activation  
49 and protection against infections and cancer<sup>9</sup>. While IFN $\gamma$  results in only a transient activation of  
50 GBPs, cells maintain a heritable epigenetic memory of activation for up to 14 days of continued  
51 proliferation in the absence of target gene expression<sup>8</sup>. This primed state results in hyperactivation of  
52 GBP genes upon re-exposure to IFN $\gamma$  which may represent a crucial means for enhanced innate  
53 immune responses to repeated cellular insults.

54 To define the mechanism of transcriptional memory, we previously surveyed both trans-acting  
55 factors<sup>8,10</sup> and chromatin features<sup>8</sup>. Here, we discovered an IFN $\gamma$ -induced chromatin signature  
56 associated with transcriptional memory. This includes the acquisition of unique active histone marks  
57 (H3K4 monomethylation and H3K14 and H4K16 acetylation) and selective removal of repressive  
58 modification (H3K27 trimethylation). This chromatin signature is heritably maintained post-stimulation  
59 in proliferating cells, specifically at GBP genes that show transcriptional memory. After the initial IFN $\gamma$   
60 stimulation ceases and in the absence of ongoing transcription this heritable chromatin state  
61 functionally regulates future GBP gene expression triggered by IFN $\gamma$ .

62 Unexpectedly, IFN $\gamma$ -mediated induction of gene expression causes also a cluster-wide accumulation  
63 of repressive H3K27 trimethylation at and around GBP genes during initial stimulation. Subsequently,  
64 H3K27 trimethylation is removed selectively at GBP memory genes in primed and reinduction  
65 conditions. Furthermore, we uncovered a cis-regulatory element that generates long-range  
66 interactions within the GBP cluster enhanced during IFN $\gamma$  induction. While these long-range  
67 interactions are not inherited post-stimulation, the element functions as a repressor of hyperactivation  
68 of GBP memory genes.

69 Our results are consistent with a model where the GBP memory loci selectively retain an  
70 epigenetically inherited chromatin signature after initial IFN $\gamma$  stimulation, which in turn accelerates  
71 future expression hyperactivation upon IFN $\gamma$  re-exposure. GBP gene hyperactivation is restricted by  
72 a repressive cis-regulatory element forming long-range interactions that are themselves not  
73 epigenetically inherited post-stimulation. Our results have broad mechanistic implications for the  
74 understanding of epigenetic memory of gene expression triggered by past exposure to the stimuli.

## 75 **Results**

### 76 **Specific active chromatin modifications are established during priming and heritably** 77 **maintained at GBP memory genes post-stimulation**

78 To discover potential carriers of mitotically heritable memory of gene activation, we explored a  
79 previously established model of interferon- $\gamma$  (IFN $\gamma$ ) gene activation<sup>7,8</sup>. We exposed human (HeLa) cells  
80 to recurrent IFN $\gamma$  stimulation (priming and reinduction) separated by days or weeks in the absence of  
81 a stimulus and continuous cell proliferation (Fig. 1A). Analysis of our previously reported RNA-seq  
82 dataset<sup>8</sup> revealed that the expression of the majority of IFN $\gamma$  inducible genes are activated to a similar  
83 level, irrespective of whether they have been activated before, indicating no memory of prior  
84 exposure. However, a subset of genes shows hyperactivation of expression upon reinduction  
85 compared to priming (Fig. 1A, B), as described<sup>5,8</sup>. The most prominent among these is the GBP family  
86 of genes, where GBP1, GBP5 and GBP4 exhibit the highest degree of hyperactivation (strong  
87 memory GBPs), while GBP2 show weak hyperactivation. Interestingly, all these GBP genes are

88 paralogous that are proximally arranged as a gene cluster on human chromosome 1. These findings  
89 suggest that an initial IFN $\gamma$  stimulation (priming) induces a primed state within this cluster that allows  
90 faster and stronger expression of GBP memory genes upon IFN $\gamma$  re-exposure (reinduction) (Fig. 1A,  
91 B). As the genes are not expressed in the intervening period between IFN $\gamma$  pulses while cells  
92 continuously proliferate, this suggests that cells maintain an epigenetic mode of transcriptional  
93 memory.

94 We sought to discover the mechanism driving transcriptional memory at GBP genes. We previously  
95 found that trans-acting factors including upstream IFN $\gamma$  signalling, JAK kinase activity, Polymerase II  
96 occupancy and activation of the key downstream transcription factor STAT1 are not the carriers of  
97 long-term memory<sup>10</sup>. Similarly, cis-acting chromatin features that are associated with active gene  
98 expression, including an increase in chromatin accessibility, H3K27 acetylation and H3K36  
99 trimethylation are only transiently associated with GBP genes but return to baseline levels upon loss  
100 of expression<sup>8</sup>.

101 Given the heritable nature of gene priming, we explored changes in specific chromatin modifications  
102 based on their potential to be maintained through cell division and their association with active genes  
103 that heritably control cell fate. These include histone H3K4 mono and trimethylation and H3K14  
104 and H4K16 acetylation as they have been canonically implicated in regulating active chromatin states<sup>11-  
105 14</sup>. We assessed their enrichment in chromatin by Cut&Run-seq<sup>15</sup> in naïve cells, during IFN $\gamma$   
106 stimulation, in the period post-stimulation (primed) and upon reinduction. While these modifications  
107 are present at basal levels in naïve cells, they accumulated at GBP promoters and bodies upon IFN $\gamma$   
108 induction and accumulated further upon reinduction (Fig. 1C, D), correlating with gene expression  
109 (Fig. 1A). The enhanced accumulation of these modifications relative to the level observed during  
110 priming at GBP genes is among the highest observed across the genome (Fig. S1A).

111 Upon IFN $\gamma$  removal, H3K4me3 levels are rapidly lost in primed cells, with little remaining after 2 days  
112 and reach pre-stimulation levels by 7 days post IFN $\gamma$  washout (Fig. 1C, D). This indicates H3K4me3  
113 is an acute, non-memorized mark associated with ongoing expression that is reset when transcription  
114 ceases.

115 In striking contrast, we observed different dynamics of H3K4me1, H3K14ac and H4K16ac that were  
116 all maintained in primed cells at levels above those in naïve cells (Fig. 1C, D). The degree of retention  
117 is the highest on the strongest (GBP1, 4, 5) relative to weak GBP memory genes (GBP2) (Fig. 1C-E)  
118 or the rest of the genome (Fig. S1A). This suggests that H3K4me1, H3K14ac and H4K16ac are  
119 selectively retained on the chromatin of memory GBPs in primed cells, despite that lack of GBP  
120 expression and continuous cell proliferation for up to 7 days (~7 cell divisions). These findings suggest  
121 that the maintenance of unique active chromatin modifications post-stimulation could confer  
122 transcriptional memory and allow differential expression of memory genes to recurrent stimulations.

### 123 **IFN $\gamma$ -activated GBP cluster accumulates repressive chromatin that is selectively removed from** 124 **GBP memory genes post-stimulation**

125 In addition to the propagation of active chromatin marks, the removal of repressive marks may also  
126 contribute to the maintenance of a primed state. To investigate this, we analysed the Polycomb-  
127 mediated repressive histone mark, H3K27me3<sup>16</sup>, by Cut&Run-seq to assess chromatin enrichment  
128 during and after IFN $\gamma$  stimulation. We find H3K27me3 is pre-established broadly across the GBP  
129 cluster in naïve cells, including intergenic regions, in agreement with the lack of GBP expression  
130 before stimulation (Fig. 2A-C, G; Fig. S2A-C). Surprisingly, while H3K27me3 has a known repressive  
131 role in transcription<sup>16</sup>, we find it further accumulates across the cluster during priming (Fig. 2A-C; Fig.  
132 S2), when GBP genes are upregulated. This broad accumulation is generally maintained over the  
133 cluster in primed and reinduction conditions (Fig. S2A-C). In contrast, H3K27me3 is locally depleted  
134 from gene bodies and proximal promoters of strong memory genes (GBP1, 2, 4, 5) (Fig. 2A-C). At

135 these genes, loss of H3K27me3 is initiated after IFN $\gamma$  priming and is maintained during memory and  
136 further depleted during reinduction. Genome-wide analysis reveals that the selective loss of  
137 H3K27me3 in primed and reinduction conditions is the most prominent at GBP memory genes (Fig.  
138 S2C).

139 Furthermore, we observed that the limits of this repressive domain coincide with previously reported  
140 TAD borders around the GBP cluster<sup>17,18</sup> (Fig. S3A). H3K27me3 enrichment at GBP cluster overlaps  
141 with a B compartment as defined by HiC<sup>17</sup> and shows overall higher levels compared to the cluster-  
142 wide active modifications, H3K14ac and H4K16ac (Fig. S3A). Such observation suggests that GBP  
143 cluster resides in a generally repressive chromatin domain.

144 To determine how repressive chromatin relates to active chromatin features at the GBP cluster we  
145 compared H3K27me3 with the H3K14ac mark within the same experiment as the latter is efficiently  
146 maintained at IFN $\gamma$ -primed cells (Fig. 1C, D). Analysis 4 hours post IFN $\gamma$  stimulation shows that both  
147 H3K14ac and H3K27me3 are already accumulated above naïve levels indicating that chromatin  
148 reorganization is rapid (Fig. 2D-G). Over the course of IFN $\gamma$  activation, we observed a gradual  
149 increase in H3K14ac and a gradual local loss of H3K27me3 at GBP memory genes (Fig. 2D-G). The  
150 quantitative changes in chromatin structure may result either from a cell-autonomous gradual  
151 increase of target gene expression and/or an increase in the fraction of IFN $\gamma$ -responsive cells<sup>8</sup>.  
152 Interestingly, we find that while during priming both H3K27me3 and H3K14ac accumulate on memory  
153 GBP genes, in primed cells, their local occupancy becomes antagonistic, where the highest H3K14ac  
154 peaks overlap with regions of local H3K27me3 depletion (Fig. 2A-D). This inverse enrichment is  
155 further extended during reinduction. These results suggest that while initially co-enriched, active and  
156 repressive chromatin modifications at the GBP cluster occupy locally distinct chromatin regions during  
157 the memory phase. The combined maintenance of active chromatin and selective removal of  
158 repressive modifications could underpin the transcriptional memory of GBP genes.e

### 159 **The writers for H3K14ac & H3K27me3 are functionally required for GBP gene expression and** 160 **memory**

161 To assess the functional requirement for the active retention of active chromatin and local loss of  
162 repressive histone marks in transcriptional memory at GBP genes, we depleted the writers for these  
163 marks in the context of IFN $\gamma$  priming and memory. First, we targeted the H3K14ac writer, KAT7 (also  
164 known as MYST2/HBO1)<sup>19,20</sup> as this mark is strongly maintained in the primed state, post-stimulation  
165 (Fig. 1C, D). To minimize off-target and indirect effects we transiently depleted KAT7 with two distinct  
166 siRNAs (KAT7 siRNA-1 and -2) during the memory phase, directly comparing naïve and primed cells  
167 (Fig. 3A). We assessed the expression level of GBP memory genes (GBP1, 4, 5) and non-memory  
168 controls (STAT1, IRF1) and KAT7 by a Real-Time quantitative PCR (RT-qPCR) (Fig. 3B, C).

169 As expected KAT7 depletion generally results in downregulation of all tested genes (Fig. 3B, C).  
170 However, while the loss of expression of GBP memory genes was modest during priming, KAT7  
171 depletion resulted in a stronger downregulation during reinduction (Fig. 3B, C, J). The stronger  
172 requirement for KAT7 during reinduction is specific for memory GBP genes as non-memory IFN $\gamma$ -  
173 inducible controls (STAT1 and IRF1), showed a similar degree of downregulation in either condition  
174 (Fig. 3B, C). While we cannot exclude indirect effects, these results suggest that KAT7 and its catalytic  
175 product H3K14ac are functionally required to promote GBP memory gene expression, particularly  
176 during reinduction. This conditional dependency is consistent with the post-stimulus H3K14ac  
177 retention and high enrichment in primed and reinduction states (Fig. 1C, D; Fig. 2A-C).

178 Next, we targeted EZH1/2, the methyltransferases of the PRC2 complex that generate the repressive  
179 H3K27me3 mark<sup>21,22</sup>. To target this complex with high temporal control we took advantage of a  
180 selective small molecule inhibitor (EZH1 – UNC1999)<sup>23</sup> in an experimental regime similar to that of  
181 KAT7 inhibition (Fig. 3D). EZH1/2 inhibition resulted in the upregulation of all tested genes (Fig. 3E,

182 F), consistent with its known role in gene repression. Interestingly, the upregulation of GBP memory  
183 genes is much stronger during priming than reinduction (Fig. 3E, F; Fig. S4A, B). In contrast, non-  
184 memory IFN $\gamma$  target genes showed no significant upregulation compared to mock (STAT1) in either  
185 condition (Fig. 3E, F; Fig. S4A, B). These results indicate that EZH1/2, likely through its product,  
186 H3K27me3, represses the expression of GBP memory genes, particularly during priming. This  
187 conditional dependency is consistent with the high enrichment of H3K27me3 in the GBP cluster in  
188 naïve cells and during priming. In primed cells and upon reinduction, H3K27me3 is largely depleted,  
189 consistent with a minor functional role for EZH1/2 in expression at this stage (Fig. 2A-C).

190 Combined our manipulation of KAT7 and EZH1/2 suggests that both the active and repressive  
191 chromatin dynamics we observed during priming and memory are functionally required for GBP  
192 expression and memory of the primed state.

### 193 **Small molecule screening identifies putative regulators of IFN $\gamma$ -induced transcriptional** 194 **memory**

195 To discover any other potential regulators of IFN $\gamma$  priming of GBP genes, we screened a subset of the  
196 Epigenetic Chemical Probe Library from the Structural Genomics Consortium's (SGC)<sup>24</sup> containing  
197 21 small molecules targeting chromatin modifiers. To assess these compounds, we built an IFN $\gamma$   
198 expression and memory reporter cell line in which we included GFP as part of the endogenous GBP1  
199 mRNA, expressed as a separate polypeptide, fatefully reporting GBP1 expression in HeLa cells (Fig.  
200 S4C). Next, we treated these cells with the indicated SGC compounds before IFN $\gamma$  activation of the  
201 GBP1 reporter and screened for GFP fluorescence by high throughput microscopy (Fig. S4C). While  
202 most compounds did not significantly affect IFN $\gamma$  induction of GBP1-GFP we identified SGC0946  
203 (inhibitor for DOT1L – H3K79 methyltransferase)<sup>25</sup> as a putative hit that leads to enhanced GBP1-  
204 GFP expression during IFN $\gamma$  activation (Fig. S4D). We also observed a small, but significant, GBP1-  
205 GFP downregulation with NVS-MLLT-1 ((inhibitor for MLLT1 – chromatin reader component of super  
206 elongation complex)<sup>26</sup> and SGC6870 (inhibitor for PRMT6 – arginine methyltransferase)<sup>27</sup>. We also  
207 identified UNC1999, the inhibitor for EZH1/2 in this screen validating our earlier RT-qPCR results on  
208 EZHi (Fig. S4D, E; Fig. 3D-F).

209 We then explored the potential role of the positive hits (DOT1Li and EZHi) in priming and reinduction.  
210 Furthermore, to assess whether the effect of KAT7 depletion on GBP expression shown above is  
211 specific, we also included an inhibitor for p300 (p300i), an acetyltransferase for H3 and H4 distinct of  
212 KAT7<sup>28</sup>, and an inhibitor for G9a (G9a-i), a methyltransferase for repressive H3K9 methylation<sup>29</sup>. We  
213 measured GBP1-GFP expression during priming and reinduction following drug treatments by FACS  
214 which allowed us to score a large number of cells (Fig. 3G). We found that treatments with DOT1Li  
215 and EZHi increased GBP1-GFP fluorescence in both conditions (Fig. 3H, I). In contrast, inhibition of  
216 G9a did not alter GBP1-GFP expression, suggesting that GBP expression is selectively dependent  
217 on Polycomb-mediated repressive chromatin and not H3K9 methylation or its writer (Fig. 3H).  
218 Similarly, inhibition of p300 led only to a small, but significant, change in GBP expression, suggesting  
219 that the histone acetylation installed by KAT7 is selectively required for GBP expression rather than  
220 p300-mediated acetylation such as H3K27Ac (Fig. 3H). Importantly, in agreement with RT-qPCR  
221 results (Fig. 3D-F), we observed a higher degree of GBP1-GFP upregulation in priming than  
222 reinduction (Fig. 3H, I) upon EZH1/2 inhibition, confirming that the H3K27me3 and/or EZH1/2 are key  
223 limiting factors, particularly during GBP priming.

224 In sum, by small molecule screening, we identified EZH1/2, but also DOT1L, as a potential repressor  
225 of GBP expression memory genes during IFN $\gamma$  stimulation. These findings suggest that, in addition to  
226 the repressive role of H3K27me3 described above, DOT1L or its catalytic products H3K79me1/2/3  
227 may contribute to GBP cluster control, although this requires future investigation.

### 228 **A cis-regulatory element controls gene repression across the GBP cluster**

229 Further analysis of the distribution of active and repressive chromatin modifications revealed their  
230 accumulation not only at GBP genes themselves but also at intergenic regions across the cluster (Fig.  
231 1; Fig. 2). This suggests that the GBP genes and the surrounding chromatin domain may be regulated  
232 globally across the cluster by a common control element.

233 To discover such elements, we compared the enrichment of H3K4me1, H3K14ac, H4K16ac with the  
234 binding of the key IFN $\gamma$ -induced transcription factor STAT1<sup>4</sup>. In addition to GBP gene promoters, we  
235 previously found STAT1 to target two elements 16 and 37 kb upstream of the GBP5 promoter (Fig.  
236 4A)<sup>10</sup>. Strikingly, we find high enrichment of active chromatin modifications (H3K4me1, H3K14ac,  
237 H4K16ac) in primed cells not only at the bodies and promoters of GBP genes but also at the STAT1-  
238 bound intergenic elements, termed Element 1 (E1) and Element 2 (E2) (Fig. 4B, D). Similar to GBP  
239 gene promoters, these elements also exhibit removal of H3K27me3 in primed cells (Fig. 4C, D) and  
240 generally display similar chromatin landscape dynamics throughout IFN $\gamma$  priming regime as GBP  
241 memory genes (Fig. 1; Fig. 2; Fig. 4B, C).

242 To determine the functional relevance of these putative cis-regulatory elements, we generated  
243 CRISPR knock-out lines for E1 and E2 and analyzed the consequences for IFN $\gamma$  priming and  
244 reinduction of GBP genes by RT-qPCR (Fig. 5A). First, we assessed a polyclonal knockout line for E1  
245 and two independently generated polyclonal knockout lines for E2 (*E2-1*, *E2-2*, Fig. 5A). While loss  
246 of E1 does not have a significant effect on GBP expression, *E2-1* and *E2-2* showed a marked  
247 upregulation of GBP memory genes, primarily upon reinduction (Fig. 5B). To confirm these results  
248 and exclude clonal heterogeneity, we subcloned a monoclonal line from the *E2-2* population and  
249 subjected it to a full IFN $\gamma$  stimulation regime alongside wild type controls (Fig. 5C). In agreement with  
250 the polyclonal lines, we find that loss of E2 results in strong upregulation of memory GBP genes,  
251 selectively during IFN $\gamma$  reinduction while its contribution to initial priming is modest (Fig. 5D). This  
252 effect is specific to strong memory GBP genes (GBP1, 4 and 5) as STAT1 is not affected and weak  
253 memory control GBP2 is only marginally affected (Fig. 5C, D).

254 In sum, we discovered that the E2 cis-regulatory element is a transcriptional repressor of GBP genes,  
255 not only of the proximal GBP5 gene but across the GBP cluster including distant loci (i.e. GBP1). Our  
256 finding that a role for E2 is more pronounced in primed cells than in naïve conditions, suggests a  
257 selective role in transcriptional memory, curbing hyperexpression of GBPs.

## 258 **Cis-regulatory elements mediate cluster-wide interactions upon IFN $\gamma$ stimulation**

259 Our discovery of the cluster-wide role of E2 in repressing GBP expression suggests that it may act  
260 through long-range interactions. Chromatin looping e.g. in the context of enhancers or silencers  
261 contacting gene promoters has been previously implicated in epigenetic memory<sup>30-33</sup>. To explore this  
262 possibility, we employed Capture-C<sup>34</sup>, a modified HiC-type chromosome conformation capture method  
263 allowing unbiased assessment of all chromatin interactions from a selected genomic viewpoint. We  
264 designed specific hybridization probes to isolate the E2 locus following *in vivo* crosslinking,  
265 fragmentation and self-ligation to identify distal chromatin interactions. We also isolated a Cohesin-  
266 enriched locus upstream of GBP6 (labelled CH-C) that we previously identified as a repressor of the  
267 GBP memory genes<sup>8</sup>. We performed Capture-C in the context of the IFN $\gamma$  stimulation regime and  
268 found that both E2 and CH-C loci broadly engage chromatin, selectively within the GBP cluster across  
269 all conditions (Fig. 6A). The boundaries of these interactions coincide with previously identified  
270 Cohesin-enriched sites<sup>8</sup> and TAD borders in naïve HeLa cells<sup>17</sup>. These interaction boundaries also  
271 overlap with the delimited enrichment of heritable chromatin modifications (Fig. 1; Fig. 2; Fig. S3),  
272 suggesting that the GBP cluster forms a specific chromatin domain distinct from neighbouring regions.  
273 Indeed, we did not detect interactions beyond the GBP locus on chromosome 1, nor trans-interactions  
274 to other chromosomes (Fig. 6A, S5A).

275 Further analysis of interactions within the GBP cluster revealed that, while interactions occur in the  
276 absence of GBP gene expression (naïve cells), IFN $\gamma$  priming of the cluster triggers a marked increase  
277 in contact frequency (Fig. 6A, B), suggesting that IFN $\gamma$  triggers spatial compaction of the cluster. Both  
278 the E2 and CH-C loci show enhanced engagement with virtually all genes and loci tested within the  
279 cluster. However, these contacts are transient and occur only during IFN $\gamma$  activation and are reset in  
280 primed cells (Fig. 6). Consistent with this, we find no memory of long-range contact resulting in a  
281 similar degree of long-range engagement of E2 and CH-C with the GBP cluster upon reinduction (Fig.  
282 6).

283 We validated these Capture-C results by conventional 3C-qPCR experiments. Using primers probing  
284 E2 or CH-C in combination with selected regions within the GBP cluster. We confirmed that pairwise  
285 interactions between these loci or with GBP promoters are increased upon IFN $\gamma$  activation of the  
286 cluster but reset upon IFN $\gamma$  withdrawal (Fig. S6A), while no ligation controls and distal loci confirm the  
287 selectivity of the method (Fig. S7).

288 Combined, we identified long-range interactions within the GBP cluster, delimited by Cohesin-marked  
289 boundaries. We find that the long-range interactions are associated with an acute non-memorized  
290 response to IFN $\gamma$ . Importantly, in addition to contacting GBP genes, we also identified increased  
291 interactions between the E2 and CH loci (Fig. S6), suggesting that both repressive cis-regulatory  
292 elements could potentially regulate each other.

### 293 **Delayed activation of repressive cis-regulatory elements facilitates hyperexpression of GBP** 294 **memory genes following IFN $\gamma$ priming**

295 The GBP cluster is rapidly activated by IFN $\gamma$  and primed for hyperactivation upon reinduction (Fig. 1A,  
296 B). Yet, paradoxically, we identified a novel cis-regulatory element that represses GBP expression  
297 (Fig. 5). We next explored how the GBP cluster can be strongly activated despite the repressive effect  
298 of the E2 element. As E1 and E2 are STAT1 transcription factor-bound (Fig. 4A) we expected these  
299 elements to produce non-coding RNAs as commonly found at enhancer elements<sup>35</sup>. Indeed, we  
300 detected ncRNAs by RT-qPCR specifically upon IFN $\gamma$  activation (Fig. S8) and used these as a readout  
301 of the activity of these elements. Importantly, both cis-regulatory elements show hyperactivation  
302 during IFN $\gamma$  reinduction compared to priming (Fig. S8), indicating they exhibit transcriptional memory,  
303 similar to GBP memory genes.

304 We hypothesized that the GBP genes and the E1 and 2 elements are activated with different kinetics  
305 allowing GBP genes to be rapidly activated but their expression curbed at a later stage. To test this,  
306 we performed a timecourse experiment in which we assessed the expression of both E1 and E2 as  
307 well as GBP genes at an early (4h) and later (24h) timepoint (Fig. 7A). We confirmed that both E1,  
308 E2 and GBP genes show transcriptional memory with enhanced expression upon re-exposure to IFN $\gamma$   
309 (Fig. 7B). However, they show a striking difference in the dynamics of activation. The GBP memory  
310 genes, while poorly expressed during priming, show a very rapid activation upon reinduction (Fig. 7B).  
311 Already at 4 hours of IFN $\gamma$ , primed cells show much higher expression than at any time during priming.  
312 In contrast, the E1 and E2 elements showed a marked delay in reactivation. At 4 hours both E1 and  
313 E2 are expressed at levels much lower than their priming levels (Fig. 7B). These results indicate that  
314 the cis-regulatory elements exhibit a delay of IFN $\gamma$ -mediated transcriptional activation compared to  
315 GBP memory genes.

316 Interestingly, when comparing the chromatin signatures of E1 and 2 with that of GBP genes we  
317 observed that the cis-regulatory elements exhibit a marked loss of H3K4me1, H3K14ac, H4K16ac  
318 relative to the levels established during priming whereas GBP genes maintain these marks to levels  
319 similar or even higher than those established during IFN $\gamma$  priming (Fig. 7C, D), consistent with their  
320 more rapid reactivation upon IFN $\gamma$  reinduction. H3K27me3 was lost from both E1 and GBP genes in

321 primed cells and upon reinduction. However, we noticed that the E2 element does not show such a  
322 pronounced loss of H3K27me3 (Fig. 7C, D), suggesting that E2 maintains a more repressive  
323 chromatin signature.

324 Overall, the delayed expression of the E1 and 2 elements, weaker maintenance of active chromatin  
325 marks and the retention of repressive H3K27me3 at E2 may explain how GBP memory genes can  
326 initially 'escape' from its repressive function.

327 We hypothesise that at a later stage during IFN $\gamma$  re-exposure, the E2 element acts to curb GBP  
328 activation, preventing excessive hyperactivation. To test this, we turned to our GBP1-GFP reporter  
329 and monitored GFP expression during the 24-hour of priming and reinduction by IFN $\gamma$  by live-cell  
330 imaging (Fig. S8). Consistent with our earlier FACS readouts (Fig. 3), GBP1-GFP is activated to  
331 modest levels during priming but hyperactivated during reinduction of previously primed cells (Fig.  
332 7H; S8D). We scored the number of cells that either activated GBP1-GFP to levels observed during  
333 priming or showed hyperactivation of GBP1-GFP unique to primed cells. We observed that the  
334 number of cells expressing GBP1 during priming gradually increases over the 24-hour period (Fig.  
335 7H). In contrast, in primed cells the number of cells that hyperactivate GBP1, while initially increasing,  
336 plateaus after approximately 10 hours (Fig. 7H). This temporal dynamics is consistent with the  
337 expression dynamics and chromatin status of the cis-regulatory elements in the GBP cluster whose  
338 delayed activation allows initial rapid GBP induction but limits later hyperactivation.

## 339 Discussion

340 Long-term transcriptional memory phenomena have been observed in species ranging from yeast to  
341 plants to humans<sup>3</sup>. In mammals, the heritable priming of cells by IFN $\gamma$  is shown to last for several  
342 weeks through multiple cell division cycles, in the absence of ongoing transcription<sup>5,7,8</sup>. Despite its  
343 strong epigenetic nature, the molecular basis for what carries this memory has remained elusive.

344 We have now identified a set of chromatin modifications (H3K4me1, H3K14ac, H4K16ac) that are  
345 established on the GBP gene cluster which shows strong transcriptional memory. These marks are  
346 maintained for at least 7 days during which cells undergo multiple rounds of genome duplication and  
347 cell division. Importantly, these marks are associated with promoting transcription yet are maintained  
348 in the absence of detectable target gene expression making them putative carriers of memory. Their  
349 stable maintenance in proliferating cells in the absence of the initial trigger, suggests active  
350 propagation allowing the re-establishment of these chromatin modifications post-replication. Read-  
351 write mechanisms engaging in a feedback loop have been described for repressive marks such as  
352 Polycomb-mediated H3K27me3<sup>36,37</sup>, H3K9 methylation at heterochromatin<sup>38</sup>, as well as for DNA CpG  
353 methylation<sup>39,40</sup>.

354 Specific active chromatin modifications including those we identified here, are reported to be locally  
355 maintained on mitotic chromosomes, constituting 'mitotic bookmarks'<sup>41-43</sup>. This behaviour is  
356 consistent with a role as mediators of transcriptional memory. However, how they engage in read-  
357 write feedback to avoid dilution during cell division remains unclear and is an important future direction  
358 of inquiry. Furthermore, our results are also consistent with the previously identified role of H3K4me1  
359 in enhancer priming<sup>44-46</sup> indicating this mark can be stably maintained.

360 In addition to the maintenance of active chromatin, we find that the PRC2 mark H3K27me3 is  
361 established across the GBP gene cluster during priming. It is unclear why strong transcriptional  
362 activation of the GBP cluster results in the recruitment of both active as well as repressive chromatin.  
363 This response may be part of a mechanism to limit the otherwise strong and rapid activation of IFN $\gamma$   
364 targets. This is consistent with our finding that limiting PRC2 activity, that is responsible for H3K27  
365 methylation, results in GBP hyperactivation. Importantly, H3K27me3 repressive chromatin is  
366 selectively depleted from memory genes and maintained at a low level in primed cells. The failure to



367 re-establish H3K27me3 following IFN $\gamma$  priming may be important to the priming of GBP genes. We  
368 propose that transcriptional memory is a consequence of the combined maintenance of active marks  
369 with the selective loss of repressive marks established during priming.

370 Furthermore, we identified a novel cis-regulatory element within the GBP cluster that makes extensive  
371 contacts with GBP genes across the cluster during IFN $\gamma$  gene activation. These long-range contacts  
372 are not themselves inherited which indicates they are a consequence rather than the cause of  
373 transcriptional activation. Importantly, we discovered that the E2 element exerts a repressive effect  
374 on GBP expression, particularly during extended exposure to IFN $\gamma$  reactivation. The E2 element has  
375 the signatures of an enhancer that is bound by the STAT1 transcription factor and generates RNAs  
376 during activation, yet, in the context of GBP expression, it acts as a repressive element. IFN $\gamma$  target  
377 genes are proinflammatory and GBP gene expression has been shown to affect cell viability<sup>47</sup>. We  
378 postulate that the E2 element is important to prevent excessive GBP activity, particularly in cells  
379 already primed by IFN $\gamma$ . We previously identified a Cohesin-bound boundary element of the GBP  
380 cluster that we found to have a similar repressive effect on GBP hyperactivation<sup>8</sup>. Possibly E2 and  
381 this boundary element cooperate in this function. How these elements exert their repressive effect on  
382 GBP expression remains an open question.

383 In summary, our findings suggest that transcriptional memory is mediated by a balance of unique  
384 active and repressive chromatin modifications that are differentially inherited in IFN $\gamma$ -primed cells,  
385 resulting in memory of prior IFN $\gamma$  exposure (Fig. 8). The output of transcriptional memory is regulated  
386 by cis-regulatory elements but their IFN $\gamma$ -dependent long-range contacts are not inherited as an  
387 epigenetic memory factors in IFN $\gamma$ -primed cells (Fig. 8). Interferons are important mediators of innate  
388 and adaptive immunity and are central to the priming of innate immune cells<sup>48</sup>. Key effectors of  
389 interferon signalling such as macrophages<sup>48</sup> play a role in trained immunity where the organisms  
390 maintain a long-term memory of prior immune activation<sup>49</sup>. The mechanisms we uncover here may  
391 contribute to the cellular memory of innate immune signals that underpin the physiological state of  
392 trained immunity.

393

## 394 **Methods**

### 395 **Cell culture**

396 HeLa Kyoto cells (female, RRID: CVCL\_1922) were grown in Dulbecco's Modified Eagle Medium  
397 (DMEM) containing high glucose and pyruvate (ThermoFisher, 41966-029) supplemented with 10%  
398 NCS (newborn calf serum, ThermoFisher, 16010-159) and 1% Penicillin–Streptomycin  
399 (ThermoFisher, 15140-122) at 37°C, 5% CO<sub>2</sub>. For temporal depletion experiments using siRNAs or  
400 drugs, 1% Penicillin–Streptomycin has been omitted in DMEM. For passaging, cells were washed  
401 with 1× DPBS (ThermoFisher), detached with TrypLE Express phenol red (ThermoFisher), and  
402 resuspended in DMEM. Cells were counted using Countess™ Cell Counting according to the  
403 manufacturer's instructions (Thermo Fisher Scientific). Transfection of cells was performed using  
404 Lipofectamine LTX (Thermo Fisher Scientific) according to the manufacturer's instructions. Cells were  
405 routinely tested for Mycoplasma contamination.

### 406 **Transcriptional memory assay**

407 Cells were primed with 50 ng/ml IFN $\gamma$  (Merck) or left untreated for 24 h, followed by IFN $\gamma$  washout  
408 with DPBS (ThermoFisher) and trypsinization by TrypLE (ThermoFisher) to harvest cells. Cells were  
409 cultured with fresh medium for another 48 h unless stated otherwise. Next, naïve and primed cells  
410 were induced by IFN $\gamma$  for 24 h. After 24 h, cells were trypsinized and harvested, and the pellets were  
411 processed for subsequent experiments.

## 412 **Cut&Run-seq**

413 Cut&Run-seq was performed using CUTANA v3 kit (Epiccypher) according to the manufacturer's  
414 protocol and with mild crosslinking (1 min incubation with 1% formaldehyde at room temperature).  
415 The antibodies used were:  $\alpha$ -H3K4me1 (Epiccypher, #13-0057),  $\alpha$ -H3K4me3 (Epiccypher, #13-0041),  
416  $\alpha$ -H3K14ac (Merck, #07-353),  $\alpha$ -H4K16ac (Merck, #07-329),  $\alpha$ -H3K27me3 (Cell Signaling  
417 Technology, #9733). Sequencing libraries were performed with NEBNext Ultra II DNA Library Prep Kit  
418 for Illumina (NEB) according to the published protocol<sup>50</sup>. The samples were multiplexed with NEBNext  
419 Multiplex Oligos for Illumina (Index Primers Set 1 and 2) (NEB). Size selection steps were performed  
420 with Ampure XP beads (Beckman Coulter) and adjusted for nucleosomal DNA fragment size (150bp,  
421 excluding adapters). The experiments were performed in biological duplicate or triplicate. The yield  
422 and quality of sequencing libraries were assessed by Qubit HS dsDNA Quantification Assay Kit  
423 (Thermo Fisher Scientific) and TapeStation 4150 System (Agilent). Multiplexed libraries were diluted  
424 to 1, 2 or 4 nM concentration and run on NextSeq 550 sequencer (Illumina) with NextSeq 500/550  
425 High Output v2.5 (75 cycles PE) kit (Illumina).

## 426 **Expression (RT-qPCR)**

427 Cell pellets (1 mln cells per sample) were re-suspended in 0.2 mL PBS and 0.8 mL TRIzol Reagent  
428 (Thermo Fisher Scientific). Cells were lysed by vortexing and incubated for 5 min at room temperature.  
429 Next, 0.16 mL chloroform was added per sample, mixed and incubated for 5 min at room temperature  
430 followed by centrifugation at 12000 g for 15 min at room temperature. The aqueous phase was mixed  
431 1:1 (v:v) with 100% isopropanol and incubated at -20 C for 30 min, followed by centrifugation at 12000  
432 g for 30 min at 4°C. The supernatant was removed and the pellet was washed with 1 mL of 75%  
433 ethanol and air-dried for 10 minutes. Finally, RNA pellets were re-suspended in 50  $\mu$ L nuclease-free  
434 water. Any residual DNA contamination was removed with TURBO DNA-free™ Kit (Thermo Fisher  
435 Scientific), according to the manufacturer's protocol. 1.5-2 ug RNA per sample was taken for cDNA  
436 synthesis, performed using a High-Capacity RNA-to-cDNA Kit (Applied Biosystems). Final cDNA  
437 samples were diluted 10 times before qPCR measurements. The qPCR assay was performed with  
438 iTaq Universal SYBR Green Supermix (Biorad), according to the manufacturer's protocol. All RT-  
439 qPCR assays were performed in technical and biological triplicates. Primers used are specified in  
440 Table S1. Primer efficiency was determined computationally from amplification efficiency per PCR  
441 cycle using LinReg software<sup>51</sup>. The qPCR conditions were: 95°C 3 minutes; [95°C 10 s; 60°C 30 s]x50  
442 cycles, followed by melting curve step (temperature range: 95-60C). The relative expression level of  
443 target genes was calculated using the efficiency-corrected  $\Delta\Delta$ Ct method (Pfaffl method)<sup>52</sup>.

## 444 **RNA interference and small molecule inhibitors**

### 445 **siRNA**

446 All siRNA transfections were performed on trypsinized cells. The cells were seeded in 6-well plates  
447 ( $2.25 \times 10^5$  cells per well) supplemented with 5 nM siRNA premixed with Opti-MEM Reduced Serum  
448 Medium (Gibco) and Lipofectamine RNAi Max Transfection Reagent (Thermo Fisher Scientific),  
449 according to the manufacturer's protocol. The siRNAs were obtained from Silencer Select Pre-  
450 Designed and Validated siRNA (Thermo Fisher Scientific): KAT7 siRNA-1 (108177), KAT7 siRNA-2  
451 (108179). Neg9 (N9) depletion siRNA target 5'-UACGACCGGUCUAUCGUAGTT -3' was used as a  
452 control. The experiments were performed in biological triplicate.

### 453 **Small molecule inhibitors (EZHi and DOT1Li)**

454 EZHi (UNC1999) and DOT1Li (SGC0946) were obtained from the Structural Genomics Consortium  
455 (SGC)<sup>24</sup>. The incubation with inhibitors was performed on trypsinized cells. GBP1-GFP cells were  
456 seeded in 24-well plates ( $1.6 \times 10^4$  cells per well) in 1 ml Dulbecco's Modified Eagle Medium (DMEM)  
457 supplemented with 2  $\mu$ M of the respective inhibitor. Mock control (cells supplemented with 100%

458 DMSO in the same volume as inhibitors) was included in each experiment. The experiments were  
459 performed in 3 biological replicates per condition (priming, reinduction, naïve cells). For harvesting,  
460 cells were washed with PBS, trypsinized, crosslinked (1% formaldehyde, 10 min on rotator at room  
461 temperature) and quenched with 0.25 M glycine. The cells were subjected to FACS according to the  
462 description below. The experiments were performed in biological triplicate.

### 463 **GBP1-GFP line generation**

464 The GBP1-GFP HeLa cell line was constructed using the LentiCRISPR V2-Blast (Addgene #83480)  
465 vector containing Cas9 sequence and a gRNA targeting exon 11 of the GBP1 gene that encodes the  
466 stop codon (See Table S1 for gRNA sequence). The homology repair template cloned in pUC19  
467 consisted of a synthesised P2A-GFP cassette (Life Technologies) flanked by the GBP1 homology  
468 arms that match coordinates: chr1: 89053857-89053357 and 89053357-89052857. A silent mutation  
469 in the protospacer-adjacent motif (PAM) recognition sequence was introduced in the gRNA target of  
470 the homology arm to prevent Cas9 re-cutting after successful repair. The homology repair template  
471 was linearised before reverse co-transfection with the plasmid containing the Cas9/gRNA (1:3 ratio)  
472 using Lipofectamine<sup>TM</sup> 3000 (Thermo Fisher Scientific). The following day, cells were subjected to  
473 blasticidin treatment for 48 h. Subsequently, cells were induced with IFN $\gamma$  for 24 h and sorted to single  
474 cells by FACS based on the GFP fluorescence to generate monoclonal lines. Cells were maintained  
475 in culture for at least two weeks to erase IFN $\gamma$  priming before being used in experiments.

### 476 **High-content microscopy screening of small molecules**

477 Small molecule inhibitors were obtained from the Structural Genomics Consortium (SGC) as SGC  
478 Epigenetic Chemical Probes library<sup>24</sup>. Incubation with inhibitors was performed on trypsinized cells.  
479 GBP1-GFP cells were seeded in 96-well plates (1.6 x 10<sup>4</sup> cells per well) in 0.2 ml Dulbecco's  
480 Modified Eagle Medium (DMEM) supplemented with 2  $\mu$ M of the respective inhibitor. Mock control  
481 (cells supplemented with 100% DMSO in the same volume as inhibitors) was included in each  
482 experiment. The experiments were performed in 3 biological replicates per condition (priming,  
483 reinduction, naïve cells). Border wells of the plate were filled with PBS and excluded from the  
484 experiment to prevent temperature effects on the readout. Following transfection, the plates were  
485 incubated at room temperature for 45 min followed by standard growth conditions. For harvesting,  
486 cells were washed with PBS, crosslinked (1% formaldehyde, 10 min on rotator at room temperature)  
487 and quenched with 0.25 M glycine. Next, the cells were washed with PBS and stored at 4 C for up to  
488 7 days before imaging as microscopy-high throughput screening (microscopy-HTS). Microscopy-HTS  
489 was performed on an Opera Phenix Plus High-Content Screening System (Perkin Elmer). GFP  
490 fluorescence thresholds were adjusted per plate based on the naïve (non-fluorescent) and priming  
491 (fluorescent) conditions. Final threshold per plate was selected based on the Z-score between  
492 conditions. The percentage of cells above the threshold was used to compare controls and inhibitor-  
493 treated samples to select hits affecting GBP1-GFP expression.

### 494 **Live-cell imaging**

495 GBP1-GFP reporter cells (described above) were transduced with a pBABE retrovirus expressing  
496 H2B-mRFP<sup>53</sup> to mark nuclei, facilitating analysis. Clones were selected by puromycin resistance and  
497 scored for robust H2B-mRFP expression. Cells were primed as per "Transcriptional memory assay"  
498 described above. 5 days after IFN $\gamma$  washout (memory window) cells were transferred into the  
499 chambers of a  $\mu$ -Dish 35 mm Quad dish (Ibidi) with polymer coverslip and cultured for 24 hours in  
500 CO<sub>2</sub>-independent Live Cell Imaging Solution (Invitrogen) supplemented with 10% FBS (Life  
501 Technologies). Cells were then either induced with 50 ng/ml IFN $\gamma$  or left untreated and imaged at 1-  
502 hour intervals for 24 hours, commencing 40-60 minutes after the addition of IFN $\gamma$ . Cells were imaged  
503 on a temperature-controlled Leica DMI6000 widefield microscope at 37°C equipped with a  
504 Hamamatsu Flash Orca 4.0 sCMOS camera, using a 40 $\times$  1.4 NA objective (HC PLAN APO). GFP

505 fluorescence was quantified based on nuclei detection using TrackMate Cellpose plugin for ImageJ.  
506 The time-lapse tracks were analysed in R and filtered for continuous tracks to exclude those shorter  
507 than 24 hours. Each track was then normalised based on the first three time points. Datapoints of  
508 cells transitioning through mitosis were excluded due to transient increase in background  
509 fluorescence. The resulting tracks were used to determine the cut-off value for cells with GBP1-GFP  
510 expression or hyperactivated expression. To create a stringent cut-off, cells were considered  
511 expressing if GFP fluorescence was  $\geq 3$  times the interquartile range above the third quartile of the  
512 GFP signal in naïve cells. Similarly, cells were considered as hyperactivated expression if GFP  
513 fluorescence was  $\geq 3$  times the interquartile range above the third quartile of the GFP signal in cells  
514 during priming.

## 515 **FACS**

516 For fluorescence-activated cell sorting (FACS) and cytometry, cells were collected by centrifugation  
517 for 5 min at 500 g, re-suspended in ice-cold Sorting Medium (1% Fetal Bovine Serum in PBS,  
518 0.25mg/mL Fungizone (Thermo Fisher Scientific), 0.25 $\mu$ g/mL/10 $\mu$ g/mL Amphotericin B/Gentamicin  
519 (GIBCO)) and filtered using 5 mL polystyrene round-bottom tubes with cell-strainer caps (Falcon)  
520 before sorting and cytometry on FACS Aria III Cell Sorter (BD Biosciences). For sorting, the cells were  
521 collected in 96-well plates with Conditional Medium (1:1 mixture of fresh complete medium and  
522 medium collected from proliferating cell cultures that is 0.45 $\mu$ m filtered, supplemented with 20% Fetal  
523 Bovine Serum, 0.25mg/mL Fungizone (Thermo Fisher Scientific), 0.25 $\mu$ g/mL/10 $\mu$ g/mL Amphotericin  
524 B/Gentamicin (GIBCO)).

## 525 **CRISPR/Cas9 cloning and genome engineering**

526 E1, E2-1 and E2-2 mutants were generated with CRISPR/Cas9 technology as double-cut cis-  
527 regulatory elements' deletion lines. The gRNAs were designed using IDT and CRISPick (Broad  
528 Institute) tools. The gRNA sequences are specified in Table S1. Relevant gRNA pairs were cloned  
529 into lentiCRISPR v2-Blast (Addgene #83480) and lentiCRISPR v2 (Addgene #52961) to allow for dual  
530 antibiotic resistance after transfection (blastidicin and puromycin, respectively).

531 Resultant plasmids were co-transfected with viral packing plasmid psPAX2 (Addgene #12260) and  
532 viral envelope plasmid pMD2.G (Addgene #12259) into HEK293T cells at a molar ratio of 4:3:1,  
533 respectively followed by incubation at 37C for 3 days. Culture medium containing lentiviral particles  
534 was collected, filtered through 0.45 $\mu$ m filters, incubated with 8 mg/mL Polybrene Reagent (Merck) for  
535 1h, mixed 1:1 with fresh medium and added to Hela cells for transduction. 2 days after transduction,  
536 the cells drug selected with 5 mg/mL blastidicin and 1 mg/ml puromycin. Mutant lines were collected  
537 and validated with gDNA PCR and Sanger sequencing using the oligonucleotides specified in Table  
538 S1. E2-2 monoclonal line was generated by single-cell FACS as described above.

## 539 **Genome architecture (Capture-C-seq and 3C-qPCR)**

540 Capture-C-seq was performed as published<sup>34</sup> with the following specifications. The viewpoints were  
541 selected and their specific probes were designed using Capsequm2 software.  $5 \times 10^6$  cells were  
542 used per sample. DNA was digested with DpnII restriction enzyme (NEB) and religated with T4 DNA  
543 HC ligase (Thermo Fisher Scientific). Sonication was performed on Q500 machine (QSonica) to  
544 obtain ~200bp DNA fragments with pre-optimization of sonication conditions performed on genomic  
545 DNA control samples. Sequencing libraries were synthesized and multiplexed with NEBNext Ultra II  
546 kit (NEB). Ampure XP (Beckman Coulter) were used for size selection according to the manufacturer's  
547 protocol. The experiment was adapted for high-specificity sequencing (double hybridization with  
548 probe titration). The hybridization was performed in two separate pools with 5'-biotinylated  
549 oligonucleotides for either, E2 or CH-C, viewpoint. The oligonucleotides are listed in Table S1. The  
550 experiments per each pool were performed in biological duplicate. Sequencing was performed on

551 NextSeq550 sequencer (Illumina) using NextSeq 500/550 High Output Kit v2.5 (75 Cycles PE)  
552 (Illumina).

553 3C-qPCR was performed according to the published protocol<sup>54</sup> with the following specifications. 0.8-  
554  $1 \times 10^6$  cells were used per sample. DNA digestion was performed with DpnII restriction enzyme  
555 (NEB) and religated with T4 DNA HC ligase (Thermo Fisher Scientific). Removal of residual proteins  
556 and RNA was performed by Proteinase K (Ambion) and RNase A (Thermo Fisher Scientific)  
557 treatments, according to the manufacturer's protocols. DNA was purified with phenol-chloroform-  
558 isoamyl alcohol and ethanol, according to the published protocol<sup>55</sup>. Sample yield and quality were  
559 assessed by gel electrophoresis, Qubit BR dsDNA assays (Thermo Fisher Scientific) and Real-Time  
560 quantitative PCR (RT-qPCR) analyses performed on genomic, digested and re-ligated controls. For  
561 RT-qPCR assays, each final 3C sample was diluted to 25 ng DNA per reaction. Ct values were  
562 normalized according to the published protocol<sup>54</sup> with primer efficiency determined computationally  
563 from amplification efficiency per PCR cycle using LinReg software<sup>51</sup> and amplification of E2 or CH-C  
564 baits within digested fragment set as a loading control. The oligonucleotides used for RT-qPCR are  
565 listed in Table S1. The experiments were performed in biological triplicate.

## 566 **Bioinformatic data analysis and statistics**

### 567 **Unix**

568 All unix commands were performed in conda environments. For Cut&Run-seq data analysis, raw  
569 reads (fastq) per experiment were downloaded from Basespace servers (Illumina) using basespace-  
570 cli and concatenated per sample using base unix. Read quality was assessed using Basespace  
571 (Illumina) and FastQC<sup>56</sup> software. Next, reads were mapped to hg38 genome with Bowtie2<sup>57</sup>,  
572 adjusting trimming conditions dependent on the read quality. SAM to BAM conversion, BAM sorting  
573 and indexing were performed with Samtools v1.1<sup>58</sup>. Read duplicates were removed with Picard  
574 (MarkDuplicates command)<sup>59</sup>. Sorted and duplicate-removed BAM files were subjected to read count,  
575 normalization (CPM) and conversion to bigwig format with Deeptools v2 (bamcoverage command)<sup>60</sup>.  
576 Bigwig files were visualized in IGV<sup>61</sup> and WashU Epigenome Browser<sup>62</sup>. The read count matrices for  
577 cross-comparison between conditions and samples were generated with Deeptools v2  
578 (multibigwigsummary command)<sup>60</sup>.

579 For Capture-C-seq analysis, raw reads (fastq) per experiment were downloaded from Basespace  
580 servers (Illumina) using basespace-cli and concatenated per sample using base bash. Read quality  
581 was assessed using Basespace (Illumina) and FastQC<sup>56</sup> software. Next, reads were processed with  
582 CapCruncher pipeline<sup>63</sup> up to the generation of compressed contact matrices (HDF5 format). Contact  
583 matrices were further processed and converted to bedpe format with Cooler tool<sup>64</sup>. Filtering and  
584 normalization was performed with custom-made scripts in base unix using the same method as in the  
585 published protocol<sup>63</sup>. Final bedpe or bedgraph files were visualized in IGV<sup>61</sup> and WashU Epigenome  
586 Browser<sup>62</sup>. The read count matrices for cross-comparison between conditions and samples were  
587 generated with Deeptools v2 (multibigwigsummary command)<sup>60</sup>.

### 588 **R**

589 The read count matrices (Deeptools v2 multibigwigsummary output) from Cut&Run-seq and Capture-  
590 C-seq were processed in R v4.1<sup>65</sup> with RStudio v1.4<sup>66</sup> interface. The matrices were annotated, filtered  
591 (removal of 0 count reads) and quantified (mean, standard error, folds between conditions and  
592 statistics) using custom-made scripts. Data wrangling was performed using base R and dplyr  
593 package<sup>67</sup>. Data visualization was performed using ggplot2<sup>68</sup> and ggrepel<sup>69</sup> packages.

### 594 **Statistics**

595 If not specified otherwise, the statistics for pairwise comparison between conditions or samples were  
596 performed using Student's T-test in Microsoft Excel or base R. Hetero- or homoscedasticity was  
597 determined using F-test in Microsoft Excel or base R. The relevant significance levels are plotted as  
598 tabulated *P* values in each figure The error bars on bar plots throughout the paper correspond to  
599 SEM.

600

## 601 **Data availability**

602 All sequencing data, raw reads and processed files, were deposited in Gene Expression Omnibus  
603 (GEO) and will be publicly accessible after peer review.

604

## 605 **Code availability**

606 The scripts for the bioinformatic analyses with their parameters were deposited in public repository  
607 on GitHub under the link: <https://github.com/Pwmski/mikulski-lab/tree/main/Mikulski-et-al-2023>

608

## 609 **Acknowledgements**

610 We thank members of the Jansen lab and Wojciech Siwek (University of Gdańsk) for helpful  
611 discussions. We thank Jim Huges and Damien Downes (University of Oxford) for advice on Capture-  
612 C. We thank the Structural Genomics Consortium for access to the Epigenetic Chemical Probes  
613 library and members of Klose, Barr, Brockdorff, Nasmyth and Gergely labs (University of Oxford) for  
614 support and fruitful exchanges. This work was funded by a Senior Wellcome Research Fellowship  
615 210645/Z/18/Z to LETJ and a Goodger and Schorstein Scholarship from the University of Oxford to  
616 PM. SSHT was supported by Fundação para a Ciência e a Tecnologia (FCT) doctoral fellowship  
617 PD/BD/128438/2017. AK is a Clarendon Scholar supported by the Hill Foundation.

## 618 **References**

- 619 1. Margueron, R. & Reinberg, D. Chromatin structure and the inheritance of epigenetic  
620 information. *Nat. Rev. Genet.* **11**, 285–296 (2010).
- 621 2. D'Urso, A. & Brickner, J. H. Epigenetic Transcriptional Memory. *Curr. Genet.* **63**, 435 (2017).
- 622 3. Tehrani, S. S. H., Kogan, A., Mikulski, P. & Jansen, L. E. T. Remembering foods and foes:  
623 emerging principles of transcriptional memory. *Cell Death and Differentiation* (2023)  
624 doi:10.1038/s41418-023-01200-6.
- 625 4. Ivashkiv, L. B. IFN $\gamma$ : signalling, epigenetics and roles in immunity, metabolism, disease and  
626 cancer immunotherapy. *Nat. Rev. Immunol.* **2018 189 18**, 545–558 (2018).
- 627 5. Kamada, R. *et al.* Interferon stimulation creates chromatin marks and establishes  
628 transcriptional memory. *Proc. Natl. Acad. Sci. U. S. A.* **115**, E9162–E9171 (2018).
- 629 6. Light, W. H. *et al.* A Conserved Role for Human Nup98 in Altering Chromatin Structure and  
630 Promoting Epigenetic Transcriptional Memory. *PLOS Biol.* **11**, e1001524 (2013).
- 631 7. Gialitakis, M., Arampatzi, P., Makatounakis, T. & Papamatheakis, J. Gamma Interferon-  
632 Dependent Transcriptional Memory via Relocalization of a Gene Locus to PML Nuclear  
633 Bodies. *Mol. Cell. Biol.* **30**, 2046–2056 (2010).
- 634 8. Siwek, W., Tehrani, S. S. H., Mata, J. F. & Jansen, L. E. T. Activation of Clustered IFN $\gamma$

- 635 Target Genes Drives Cohesin-Controlled Transcriptional Memory. *Mol. Cell* **80**, 396-409.e6  
636 (2020).
- 637 9. Tretina, K., Park, E. S., Maminska, A. & MacMicking, J. D. Interferon-induced guanylate-  
638 binding proteins: Guardians of host defense in health and disease. *J. Exp. Med.* **216**, 482–  
639 500 (2019).
- 640 10. Tehrani, S. S. *et al.* STAT1 is required to establish but not maintain interferon- $\gamma$ -induced  
641 transcriptional memory. *EMBO J.* **42**, e112259 (2023).
- 642 11. Wang, Z. *et al.* Combinatorial patterns of histone acetylations and methylations in the human  
643 genome. *Nat. Genet.* **2008 407 40**, 897–903 (2008).
- 644 12. Regadas, I. *et al.* A unique histone 3 lysine 14 chromatin signature underlies tissue-specific  
645 gene regulation. *Mol. Cell* **81**, 1766-1780.e10 (2021).
- 646 13. Taylor, G. C. A., Eskeland, R., Hekimoglu-Balkan, B., Pradeepa, M. M. & Bickmore, W. A.  
647 H4K16 acetylation marks active genes and enhancers of embryonic stem cells, but does not  
648 alter chromatin compaction. *Genome Res.* **23**, 2053–2065 (2013).
- 649 14. Shogren-Knaak, M. *et al.* Histone H4-K16 acetylation controls chromatin structure and protein  
650 interactions. *Science (80-. )*. **311**, 844–847 (2006).
- 651 15. Skene, P. J. & Henikoff, S. An efficient targeted nuclease strategy for high-resolution  
652 mapping of DNA binding sites. *Elife* **6**, (2017).
- 653 16. Blackledge, N. P. & Klose, R. J. The molecular principles of gene regulation by Polycomb  
654 repressive complexes. *Nat. Rev. Mol. Cell Biol.* **2021 2212 22**, 815–833 (2021).
- 655 17. Wutz, G. *et al.* ESCO1 and CTCF enable formation of long chromatin loops by protecting  
656 cohesinstag1 from WAPL. *Elife* **9**, (2020).
- 657 18. Rao, S. S. P. *et al.* A 3D map of the human genome at kilobase resolution reveals principles  
658 of chromatin looping. *Cell* **159**, 1665–1680 (2014).
- 659 19. Kueh, A. J. *et al.* Stem cell plasticity, acetylation of H3K14, and de novo gene activation rely  
660 on KAT7. *CellReports* **42**, 111980 (2023).
- 661 20. MacPherson, L. *et al.* HBO1 is required for the maintenance of leukaemia stem cells. *Nature*  
662 **577**, 266–270 (2020).
- 663 21. Ezhkova, E. *et al.* EZH1 and EZH2 cogovern histone H3K27 trimethylation and are essential  
664 for hair follicle homeostasis and wound repair. *Genes Dev.* **25**, 485 (2011).
- 665 22. Shen, X. *et al.* EZH1 mediates methylation on histone H3 lysine 27 and complements EZH2  
666 in maintaining stem cell identity and executing pluripotency. *Mol. Cell* **32**, 491 (2008).
- 667 23. Xu, B. *et al.* Selective inhibition of EZH2 and EZH1 enzymatic activity by a small molecule  
668 suppresses MLL-rearranged leukemia. *Blood* **125**, 346 (2015).
- 669 24. Brown, P. J. & Müller, S. Open access chemical probes for epigenetic targets. *Future Med.*  
670 *Chem.* **7**, 1901 (2015).
- 671 25. Nguyen, A. T. & Zhang, Y. The diverse functions of Dot1 and H3K79 methylation. *Genes*  
672 *Dev.* **25**, 1345–1358 (2011).
- 673 26. Lin, C. *et al.* AFF4, a Component of the ELL/P-TEFb Elongation Complex and a Shared  
674 Subunit of MLL Chimeras, Can Link Transcription Elongation to Leukemia. *Mol. Cell* **37**, 429–  
675 437 (2010).
- 676 27. Guccione, E. *et al.* Methylation of histone H3R2 by PRMT6 and H3K4 by an MLL complex  
677 are mutually exclusive. *Nat.* **2007 4497164 449**, 933–937 (2007).

- 678 28. Ogryzko, V. V., Schiltz, R. L., Russanova, V., Howard, B. H. & Nakatani, Y. The  
679 Transcriptional Coactivators p300 and CBP Are Histone Acetyltransferases. *Cell* **87**, 953–959  
680 (1996).
- 681 29. Rice, J. C. *et al.* Histone Methyltransferases Direct Different Degrees of Methylation to Define  
682 Distinct Chromatin Domains. *Mol. Cell* **12**, 1591–1598 (2003).
- 683 30. Fanucchi, S. *et al.* Immune genes are primed for robust transcription by proximal long  
684 noncoding RNAs located in nuclear compartments. *Nat. Genet.* **2018 511 51**, 138–150  
685 (2018).
- 686 31. Pascual-Garcia, P., Little, S. C. & Capelson, M. Nup98-dependent transcriptional memory is  
687 established independently of transcription. *Elife* **11**, (2022).
- 688 32. Owen, J. A., Osmanović, D. & Mirny, L. Design principles of 3D epigenetic memory systems.  
689 *Science (80-. )*. **382**, (2023).
- 690 33. Tan-Wong, S. M., Wijayatilake, H. D. & Proudfoot, N. J. Gene loops function to maintain  
691 transcriptional memory through interaction with the nuclear pore complex. *Genes Dev.* **23**,  
692 2610–2624 (2009).
- 693 34. Downes, D. J. *et al.* Capture-C: a modular and flexible approach for high-resolution  
694 chromosome conformation capture. *Nat. Protoc.* **2022 172 17**, 445–475 (2022).
- 695 35. Kim, T. K., Hemberg, M. & Gray, J. M. Enhancer RNAs: A Class of Long Noncoding RNAs  
696 Synthesized at Enhancers. *Cold Spring Harb. Perspect. Biol.* **7**, a018622 (2015).
- 697 36. Margueron, R. *et al.* Role of the polycomb protein EED in the propagation of repressive  
698 histone marks. *Nat.* **2009 4617265 461**, 762–767 (2009).
- 699 37. Hansen, K. H. *et al.* A model for transmission of the H3K27me3 epigenetic mark. *Nat. Cell*  
700 *Biol.* **2008 1011 10**, 1291–1300 (2008).
- 701 38. Rangunathan, K., Jih, G. & Moazed, D. Epigenetic inheritance uncoupled from sequence-  
702 specific recruitment. *Science (80-. )*. **348**, (2015).
- 703 39. Bostick, M. *et al.* UHRF1 plays a role in maintaining DNA methylation in mammalian cells.  
704 *Science (80-. )*. **317**, 1760–1764 (2007).
- 705 40. Sharif, J. *et al.* The SRA protein Np95 mediates epigenetic inheritance by recruiting Dnmt1 to  
706 methylated DNA. *Nat.* **2007 4507171 450**, 908–912 (2007).
- 707 41. Samata, M. *et al.* Intergenerationally Maintained Histone H4 Lysine 16 Acetylation Is  
708 Instructive for Future Gene Activation. *Cell* **182**, 127-144.e23 (2020).
- 709 42. Liu, Y. *et al.* Widespread Mitotic Bookmarking by Histone Marks and Transcription Factors in  
710 Pluripotent Stem Cells. *Cell Rep.* **19**, 1283–1293 (2017).
- 711 43. Zhao, R., Nakamura, T., Fu, Y., Lazar, Z. & Spector, D. L. Gene bookmarking accelerates the  
712 kinetics of post-mitotic transcriptional re-activation. *Nat. Cell Biol.* **13**, 1295–1304 (2011).
- 713 44. Calo, E. & Wysocka, J. Modification of Enhancer Chromatin: What, How, and Why?  
714 *Molecular Cell* vol. 49 825–837 (2013).
- 715 45. Bleckwehl, T. *et al.* Enhancer-associated H3K4 methylation safeguards in vitro germline  
716 competence. *Nat. Commun.* **12**, 1–19 (2021).
- 717 46. Cheng, Q. J. *et al.* NF-κB dynamics determine the stimulus specificity of epigenomic  
718 reprogramming in macrophages. *Science (80-. )*. **372**, 1349–1353 (2021).
- 719 47. Fisch, D. *et al.* PIM1 controls GBP1 activity to limit self-damage and to guard against  
720 pathogen infection. *Science* **382**, eadg2253 (2023).



- 721 48. Borden, E. C. *et al.* Interferons at age 50: past, current and future impact on biomedicine.  
722 *Nat. Rev. Drug Discov.* 2007 612 **6**, 975–990 (2007).
- 723 49. Ochando, J., Mulder, W. J. M., Madsen, J. C., Netea, M. G. & Duivenvoorden, R. Trained  
724 immunity — basic concepts and contributions to immunopathology. *Nat. Rev. Nephrol.* 2022  
725 **191** **19**, 23–37 (2022).
- 726 50. Liu, N. Nan Liu 2021. Library Prep for CUT&RUN with NEBNext® Ultra™ II DNA Library Prep  
727 Kit for Illumina® (E7645). *protocols.io*.
- 728 51. Ruijter, J. M. *et al.* Amplification efficiency: linking baseline and bias in the analysis of  
729 quantitative PCR data. *Nucleic Acids Res.* **37**, e45 (2009).
- 730 52. Pfaffl, M. W. A new mathematical model for relative quantification in real-time RT–PCR.  
731 *Nucleic Acids Res.* **29**, e45 (2001).
- 732 53. Bodor, D. L. *et al.* The quantitative architecture of centromeric chromatin. *Elife* **2014**, (2014).
- 733 54. Rebouissou, C., Sallis, S. & Forné, T. Quantitative Chromosome Conformation Capture (3C-  
734 qPCR). *Methods Mol. Biol.* **2532**, 3–13 (2022).
- 735 55. Green, M. R. & Sambrook, J. Precipitation of DNA with Isopropanol. *Cold Spring Harb.*  
736 *Protoc.* **2017**, pdb.prot093385 (2017).
- 737 56. Babraham Bioinformatics - FastQC A Quality Control tool for High Throughput Sequence  
738 Data. <https://www.bioinformatics.babraham.ac.uk/projects/fastqc/>.
- 739 57. Langmead, B. & Salzberg, S. L. Fast gapped-read alignment with Bowtie 2. *Nat. Methods* **9**,  
740 357 (2012).
- 741 58. Danecek, P. *et al.* Twelve years of SAMtools and BCFtools. *Gigascience* **10**, 1–4 (2021).
- 742 59. Institute, B. Picard Toolkit. *GitHub Repos*.
- 743 60. Ramírez, F. *et al.* deepTools2: a next generation web server for deep-sequencing data  
744 analysis. *Nucleic Acids Res.* **44**, W160–W165 (2016).
- 745 61. Robinson, J. T. *et al.* Integrative Genomics Viewer. *Nat. Biotechnol.* **29**, 24 (2011).
- 746 62. Li, D. *et al.* WashU Epigenome Browser update 2022. *Nucleic Acids Res.* **50**, W774–W781  
747 (2022).
- 748 63. Smith, A., Rue-Albrecht, K. & mtekman. sims-lab/CapCruncher: CapCruncher v0.3.8. (2023)  
749 doi:10.5281/zenodo.10116675.
- 750 64. Abdennur, N. & Mirny, L. A. Cooler: scalable storage for Hi-C data and other genomically  
751 labeled arrays. *Bioinformatics* **36**, 311 (2020).
- 752 65. R Core Team. R: A Language and Environment for Statistical Computing. (2021).
- 753 66. RStudio Team. RStudio: Integrated Development Environment for R. (2020).
- 754 67. Wickham, H., François, R., Henry, L., Müller, K. & Vaughan, D. dplyr: A Grammar of Data  
755 Manipulation. (2023).
- 756 68. Wickham, H. *ggplot2: Elegant Graphics for Data Analysis*. (Springer-Verlag New York, 2016).
- 757 69. Slowikowski, K. ggrepel: Automatically Position Non-Overlapping Text Labels with ‘ggplot2’.  
758 (2023).

## 760 Figure legends

### 761 Fig. 1. Specific active chromatin modifications are established during priming and heritably 762 maintained at GBP memory genes post-stimulation

763 **A.** Experimental transcriptional memory regime outlining timing of IFN $\gamma$ -incubation and cell harvesting.  
764 **B.** Gene expression plots for IFN $\gamma$ -mediated stimulation comparing priming vs reinduction. Plot on the  
765 right represents detailed view from boxed area in left panel. Each dot corresponds to an individual  
766 IFN $\gamma$ -stimulated gene, color-coded according to the legend. Data reanalyzed from<sup>8</sup> **C.** Cut&Run-seq  
767 enrichment of active chromatin modifications in IFN $\gamma$ -induced transcriptional memory regime  
768 represented as genome browser snapshots over GBP cluster. Red boxes indicate regions over GBP  
769 memory genes used for quantification. **D.** Quantification of normalized Cut&Run sequencing reads  
770 for respective chromatin modifications over GBP memory genes. The error bars correspond to SEM.  
771 The black dots on bar plots correspond to individual biological replicates. **E.** *P* values for relevant  
772 pairwise comparisons of quantifications are shown in panel D. *P* values  $\leq 0.05$  are highlighted in red.  
773 Statistical significance was calculated with two-sided *t*-test and prior determination of homo- or  
774 heteroscedasticity with F-test.

### 775 Fig. 2. IFN $\gamma$ -activated GBP cluster accumulates repressive chromatin that is selectively 776 removed from GBP memory genes post-stimulation

777 **A.** Experimental transcriptional memory regime outlining timing of IFN $\gamma$ -incubation and cell harvesting.  
778 **B.** Cut&Run-seq enrichment of indicated chromatin modifications during IFN $\gamma$ -induced transcriptional  
779 memory regime represented as genome browser snapshots over GBP cluster. Red boxes indicate  
780 regions over GBP memory genes used for quantification. **C.** Quantification of normalized Cut&Run  
781 sequencing reads for respective chromatin modifications over GBP memory genes. **D.** Experimental  
782 transcriptional memory regime outlining timing of IFN $\gamma$ -incubation and cell harvesting. **E.** Cut&Run-  
783 seq enrichment of indicated chromatin modifications during transcriptional memory regime with short  
784 (4h) and long (24h) IFN $\gamma$  stimulation. The enrichment is represented as genome browser snapshots  
785 over GBP cluster. Red boxes indicate regions over GBP memory genes used for quantification. **F.**  
786 Quantification of normalized Cut&Run sequencing reads for respective chromatin modifications over  
787 GBP memory genes with short (4h) and long (24h) IFN $\gamma$  stimulation. **G.** *P* values for relevant pairwise  
788 comparisons of quantifications shown in panels: C and F. Statistical significance was calculated with  
789 two-sided *t*-test and prior determination of homo- or heteroscedasticity with F-test. *P* values  $\leq 0.05$  are  
790 highlighted in red. The error bars on all bar plots in the figure correspond to SEM. The black dots on  
791 bar plots correspond to individual biological replicates.

### 792 Fig. 3. The writers for H3K14ac, H3K27me3 and H3K79me are functionally required for GBP 793 gene expression and memory

794 **A.** Experimental scheme for transient KAT7 depletion during IFN $\gamma$  priming or reinduction. **B.**  
795 Normalized RT-qPCR data of target genes upon IFN $\gamma$  priming or reinduction after KAT7 depletion  
796 using two independent KAT7 siRNAs (siRNA-1 or -2) compared to mock siRNA control (N9). **C.** Fold  
797 changes between KAT7 siRNA-1 or -2 and mock control derived from RT-qPCR data in panel B. **D.**  
798 Experimental scheme for EZH1/2 inhibition during IFN $\gamma$  priming or reinduction. **E.** Normalized RT-  
799 qPCR data of target genes upon IFN $\gamma$  priming or reinduction after EZH1/2 inhibition compared to mock  
800 control (DMSO). **F.** Fold changes between EZHi and mock control derived from RT-qPCR data in  
801 panel E. **G.** Top: Schematic outline endogenous GBP1 gene structure in GBP1-GFP reporter line.  
802 GFP reports GBP1 activation but is separated from GBP1 by a P2A ribosomal skipping peptide.  
803 Bottom: Scheme for secondary validation of putative regulators of IFN $\gamma$  transcriptional memory from  
804 SGC small molecule screening in Fig. S4. **H.** Mean GBP1-GFP fluorescence intensities upon  
805 inhibition of putative regulators measured by FACS. Fluorescence is assessed in mock control

806 (DMSO), naïve, priming and reinduction conditions. **I.** Experiment shown in H, plotted as boxplots for  
807 DOT1Li and EZHi to show individual replicates and signal distribution across the cell population  
808 (minimum, 1<sup>st</sup> quartile, median, 3<sup>rd</sup> quartile, maximum). **G.** *P* values for relevant pairwise comparisons  
809 of quantifications shown in panels: B, E and H. *P* values  $\leq 0.05$  are highlighted in red. Statistical  
810 significance was calculated with two-sided *t*-test and prior determination of homo- or  
811 heteroscedasticity with F-test. The error bars on all bar plots in the figure correspond to SEM. The  
812 black dots on bar plots correspond to individual biological replicates.

813 **Fig. 4. GBP cluster contains uncharacterized, transcription factor-bound cis-regulatory**  
814 **elements with a transcriptional memory chromatin signature.**

815 **A.** Cut&Run-seq of the IFN $\gamma$ -activated transcription factor STAT1 after 0, 1h and 3h of activation in  
816 naïve and primed cells. Genome browser snapshots over GBP cluster (left panel) and quantification  
817 of normalized Cut&Run sequencing reads over identified cis-regulatory elements (right panel). Data  
818 reanalyzed from<sup>10</sup>. **B.** Cut&Run-seq enrichment of active chromatin modifications during IFN $\gamma$ -induced  
819 transcriptional memory regime (as shown in Figure 1) represented as genome browser snapshots  
820 over GBP cluster (left panel) and quantification of normalized Cut&Run sequencing reads over  
821 identified cis-regulatory elements (right panel). **C.** As in B but for the repressive chromatin modification  
822 H3K27me3. Red frames on all panels indicate regions used for quantification. **D.** *P* values for relevant  
823 pairwise comparisons of quantifications shown in panels: A, B and C. *P* values  $\leq 0.05$  are highlighted  
824 in red. Statistical significance was calculated with two-sided *t*-test and prior determination of homo-  
825 or heteroscedasticity with F-test. The error bars on all bar plots in the figure correspond to SEM. The  
826 black dots on bar plots correspond to individual biological replicates.

827 **Fig. 5. The E2 cis-regulatory element controls gene repression across the GBP cluster**

828 **A.** Schematic of GBP gene cluster with indicated CRISPR deletions of E1 and E2, either as polyclonal  
829 or monoclonal population. E2-1 and E2-2 indicate two independent deletions generated with distinct  
830 gRNAs (see methods). Monoclonal line was isolated from E2-2 polyclonal line by FACS. **B.**  
831 Expression of GBP memory genes in wildtype (WT) and polyclonal E1, E2-1, E2-2 deletion lines  
832 during IFN $\gamma$  priming or reinduction measured by RT-qPCR. **C.** Expression of GBP memory genes in  
833 wildtype (WT) and monoclonal E2-2 deletion line measured by RT-qPCR following IFN $\gamma$ -stimulation  
834 regime: naïve, priming, primed and reinduction conditions (as Figure 1A). The error bars on all bar  
835 plots in the figure correspond to SEM. The black dots on bar plots correspond to individual biological  
836 replicates. **D.** *P* values for relevant pairwise comparisons of quantifications shown in panels: B and  
837 C. *P* values  $\leq 0.05$  are highlighted in red. Statistical significance was calculated with two-sided *t*-test  
838 and prior determination of homo- or heteroscedasticity with F-test. The error bars on all bar plots in  
839 the figure correspond to SEM. The black dots on bar plots correspond to individual biological  
840 replicates.

841 **Fig. 6. Cis-regulatory elements mediate cluster-wide interactions enhanced during IFN $\gamma$**   
842 **stimulation**

843 **A.** Capture-C data showing long-range interactions from element E2 (top panel) or Cohesin site CH-  
844 C (bottom panel). The results show zoom-out (left panel) and zoom-in (right panel) genome browser  
845 snapshots from normalized Capture-C sequencing reads at and around GBP cluster. Genome  
846 browser tracks show 2 biological replicates per condition during IFN $\gamma$ -stimulation regime. Red boxes  
847 correspond to the regions used for read quantification and the baits. **B.** Quantification of normalized  
848 Capture-C sequencing reads for E2 (left panel) or CH-C (right panel) baits across the GBP cluster:  
849 GBP memory genes (GBP1, 4, 5), GBP non-memory genes (GBP3, 6, 7, GBP1P1) and cis-regulatory  
850 elements (E1, E2, Cohesin sites (CH-A, CH-B, CH-C)). **C.** *P* values for relevant pairwise comparisons  
851 of quantifications shown in panel B. *P* values  $\leq 0.05$  are highlighted in red. Statistical significance was  
852 calculated with two-sided *t*-test and prior determination of homo- or heteroscedasticity with F-test.

853 The error bars on all bar plots in the figure correspond to SEM. The black dots on bar plots correspond  
854 to individual biological replicates.

855 **Fig. 7. Delayed activation of cis-regulatory elements facilitates hyperactivation of GBP memory**  
856 **genes following IFN $\gamma$  priming**

857 **A.** Experimental transcriptional memory regime outlining timing of IFN $\gamma$ -incubation and cell harvesting.  
858 **B.** Expression levels of target loci (cis-regulatory elements, GBP memory genes, control non-memory  
859 genes) measured by RT-qPCR following IFN $\gamma$ -stimulation regime: naïve, priming, primed and  
860 reinduction conditions. cDNA synthesis negative controls [RT- (no reverse transcriptase)] are included  
861 for priming and reinduction conditions. **C.** Experimental transcriptional memory regime outlining timing  
862 of IFN $\gamma$ -incubation and cell harvesting. **D.** Comparative quantification of H3K14ac (left panel) and  
863 H3K27me3 (right panel) enrichment between cis-regulatory elements and GBP memory genes. The  
864 results correspond to Cut&Run sequencing read count presented in Fig. 1, 2 and 4. **E.** Experimental  
865 transcriptional memory regime outlining timing of IFN $\gamma$ -incubation and cell harvesting. **F.** Comparative  
866 quantification of H3K14ac (left panel) and H3K27me3 (right panel) enrichment between cis-regulatory  
867 elements and GBP memory genes in transcriptional memory time course. The results correspond to  
868 Cut&Run sequencing read count presented separately in Fig. 2C, D. **G.** *P* values for relevant pairwise  
869 comparisons of quantifications shown in panels: B, D and F. *P* values  $\leq 0.05$  are highlighted in red.  
870 Statistical significance was calculated with two-sided *t*-test and prior determination of homo- or  
871 heteroscedasticity with F-test. The error bars on all bar plots in the figure correspond to SEM. The  
872 black dots on bar plots correspond to individual biological replicates. **H.** Time-lapse of live-cell GBP1-  
873 GFP protein expression during priming (left) and reinduction (6 days after priming) (right). The fraction  
874 of cells with with expression and hyperactivated expression of GBP1-GFP is plotted for each time  
875 point. Hyperactivated expression during reinduction is defined as levels above those observed during  
876 priming (see methods). The bars represent mean of three replicates. The error bars correspond to  
877 SD.

878 **Fig. 8. Proposed model for IFN $\gamma$ -inducible chromatin-based transcriptional memory at GBP**  
879 **genes.**

880 The GBP cluster is embedded in a broad domain of low-level repressive H3K27me3 chromatin. IFN $\gamma$   
881 activation results in GBP transcription, and increased long-range interactions between the cis-  
882 regulatory elements, cluster boundaries and genes. It further results in establishing activating  
883 chromatin in part by KAT7, but also a further elevation of repressive chromatin mediated by PRC2. In  
884 the primed state, transcription is lost but active chromatin is selectively retained and mitotically  
885 heritable while suppressive H3K27me3 chromatin is locally depleted from GBP genes. This allows  
886 rapid and strong reactivation of GBP genes upon re-exposure to IFN $\gamma$ . The cis-regulatory element  
887 acts to repress GBPs across the cluster preventing hyperactivation by IFN $\gamma$ .

Figure 1

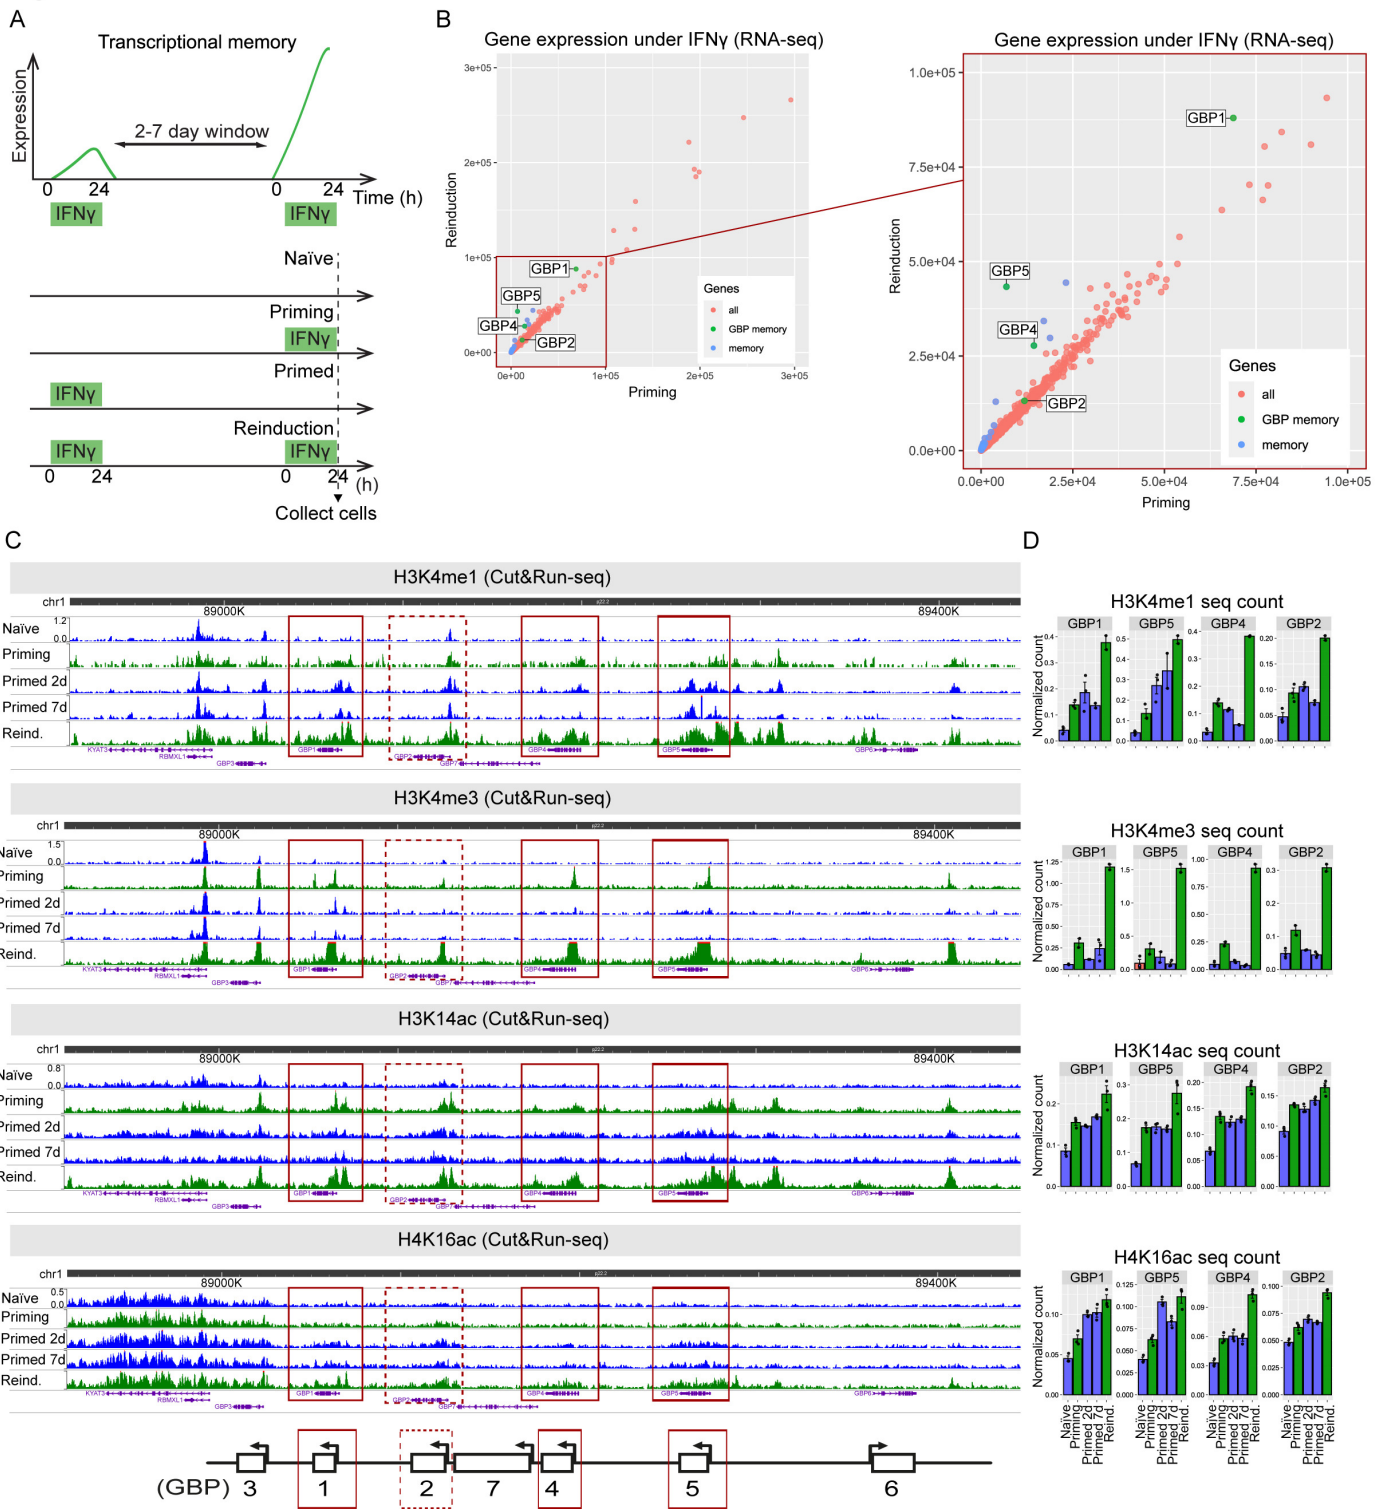

**Fig. 1. Specific active chromatin modifications are established during priming and heritably maintained at GBP memory genes post-stimulation**

**A.** Experimental transcriptional memory regime outlining timing of IFN $\gamma$ -incubation and cell harvesting. **B.** Gene expression plots for IFN $\gamma$ -mediated stimulation comparing priming vs reinduction. Plot on the right represents detailed view from boxed area in left panel. Each dot corresponds to an individual IFN $\gamma$ -stimulated gene, color-coded according to the legend. Data reanalyzed from<sup>8</sup>. **C.** Cut&Run-seq enrichment of active chromatin modifications in IFN $\gamma$ -induced transcriptional memory regime represented as genome browser snapshots over GBP cluster. Red boxes indicate regions over GBP memory genes used for quantification. **D.** Quantification of normalized Cut&Run sequencing reads for respective chromatin modifications over GBP memory genes. The error bars correspond to SEM. The black dots on bar plots correspond to individual biological replicates. **E.** P values for relevant pairwise comparisons of quantifications are shown in panel D. P values  $\leq 0.05$  are highlighted in red. Statistical significance was calculated with two-sided t-test and prior determination of homo- or heteroscedasticity with F-test.

Figure 2

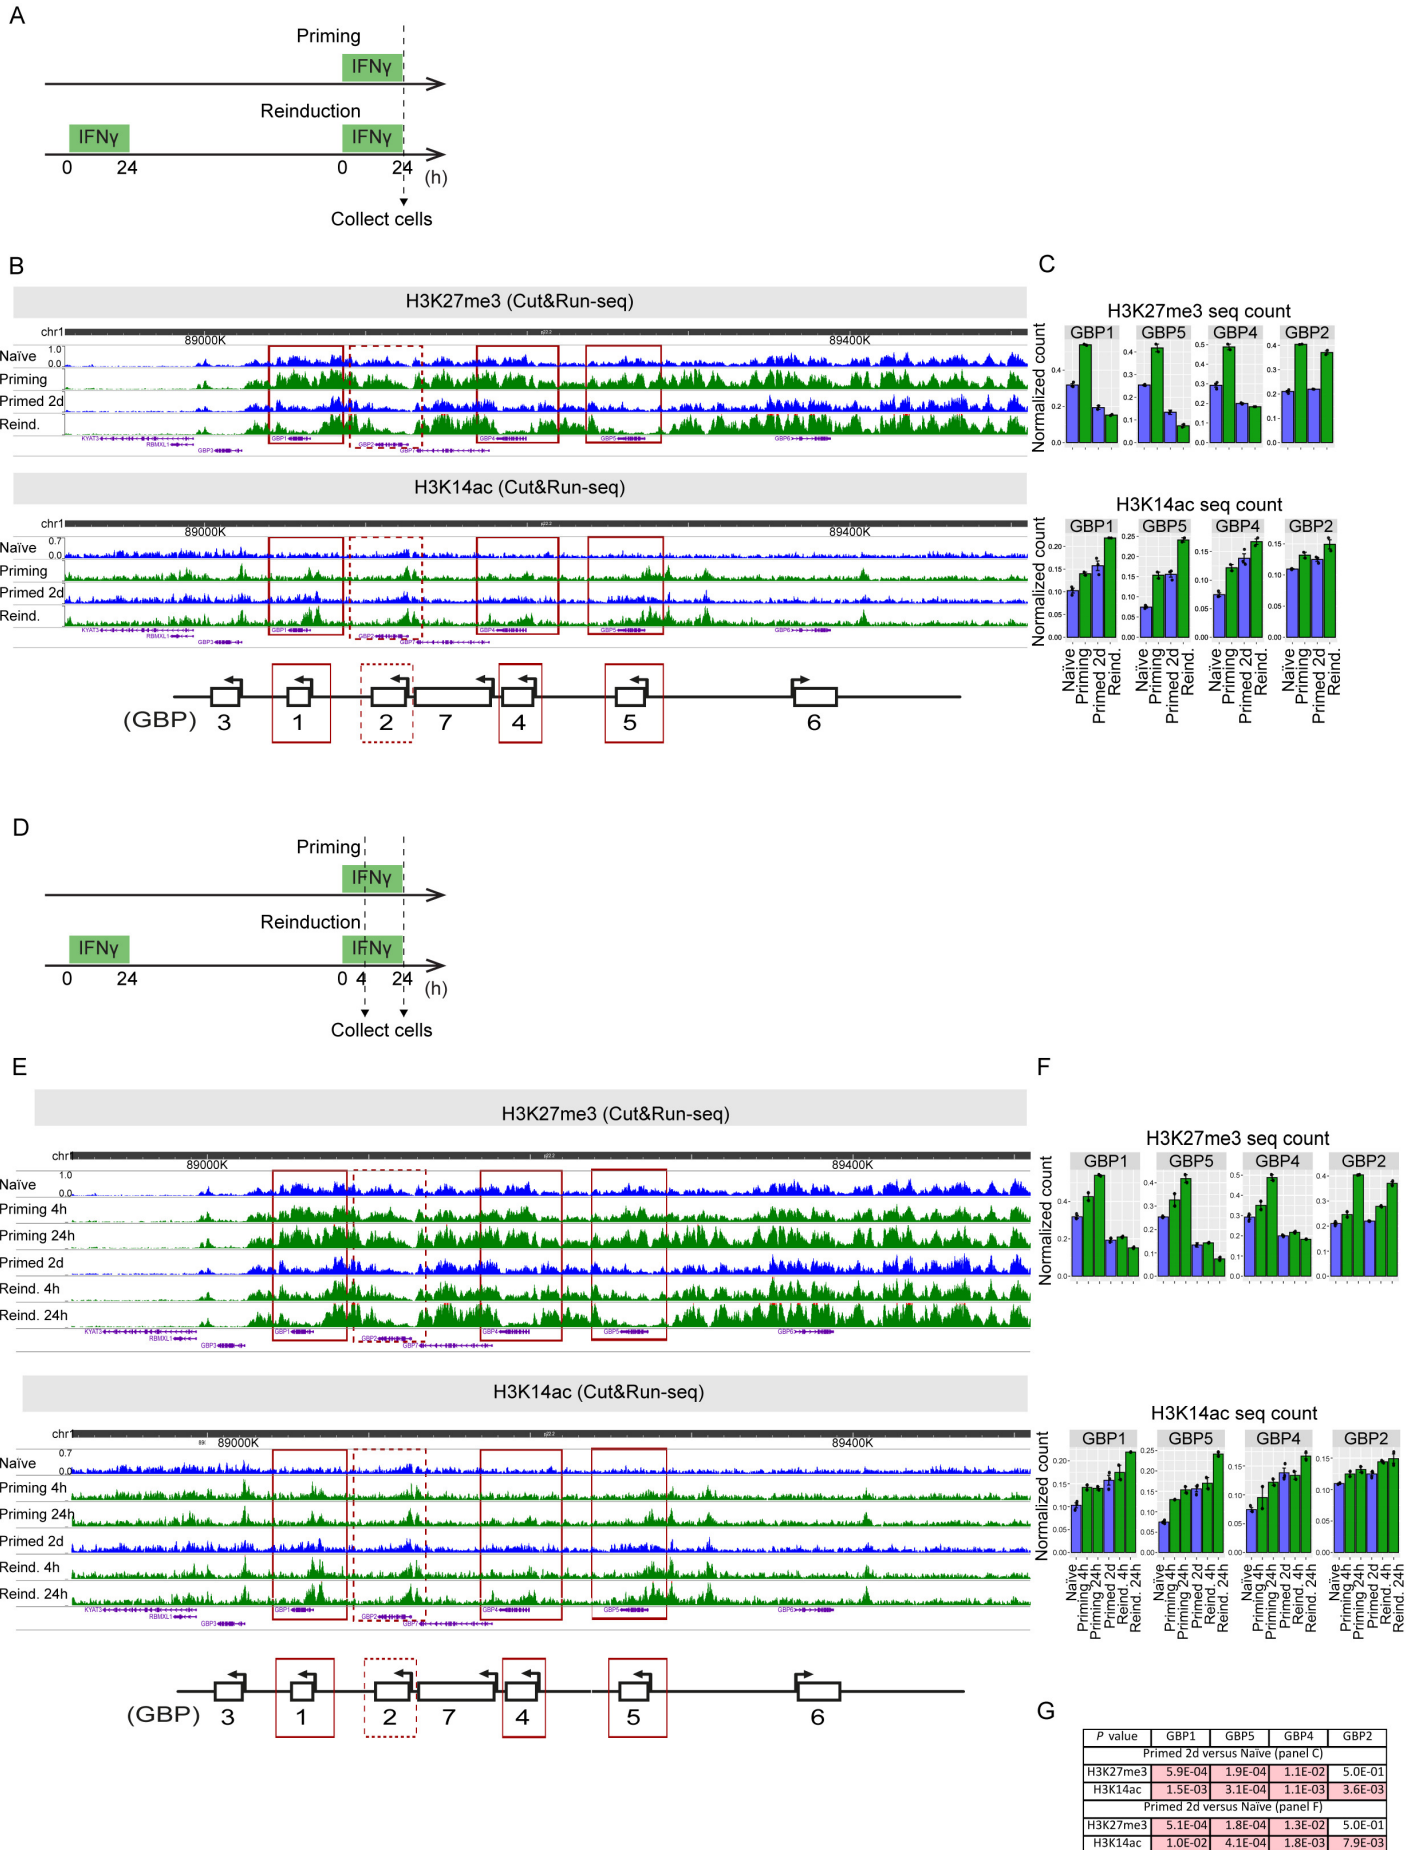

**Fig. 2. IFN $\gamma$ -activated GBP cluster accumulates repressive chromatin that is selectively removed from GBP memory genes post-stimulation**

**A.** Experimental transcriptional memory regime outlining timing of IFN $\gamma$ -incubation and cell harvesting. **B.** Cut&Run-seq enrichment of indicated chromatin modifications during IFN $\gamma$ -induced transcriptional memory regime represented as genome browser snapshots over GBP cluster. Red boxes indicate regions over GBP memory genes used for quantification. **C.** Quantification of normalized Cut&Run sequencing reads for respective chromatin modifications over GBP memory genes. **D.** Experimental transcriptional memory regime outlining timing of IFN $\gamma$ -incubation and cell harvesting. **E.** Cut&Run-seq enrichment of indicated chromatin modifications during transcriptional memory regime with short (4h) and long (24h) IFN $\gamma$  stimulation. The enrichment is represented as genome browser snapshots over GBP cluster. Red boxes indicate regions over GBP memory genes used for quantification. **F.** Quantification of normalized Cut&Run sequencing reads for respective chromatin modifications over GBP memory genes with short (4h) and long (24h) IFN $\gamma$  stimulation. **G.** P values for relevant pairwise comparisons of quantifications shown in panels: C and F. Statistical significance was calculated with two-sided t-test and prior determination of homo- or heteroscedasticity with F-test. P values  $\leq 0.05$  are highlighted in red. The error bars on all bar plots in the figure correspond to SEM. The black dots on bar plots correspond to individual biological replicates.

Figure 3

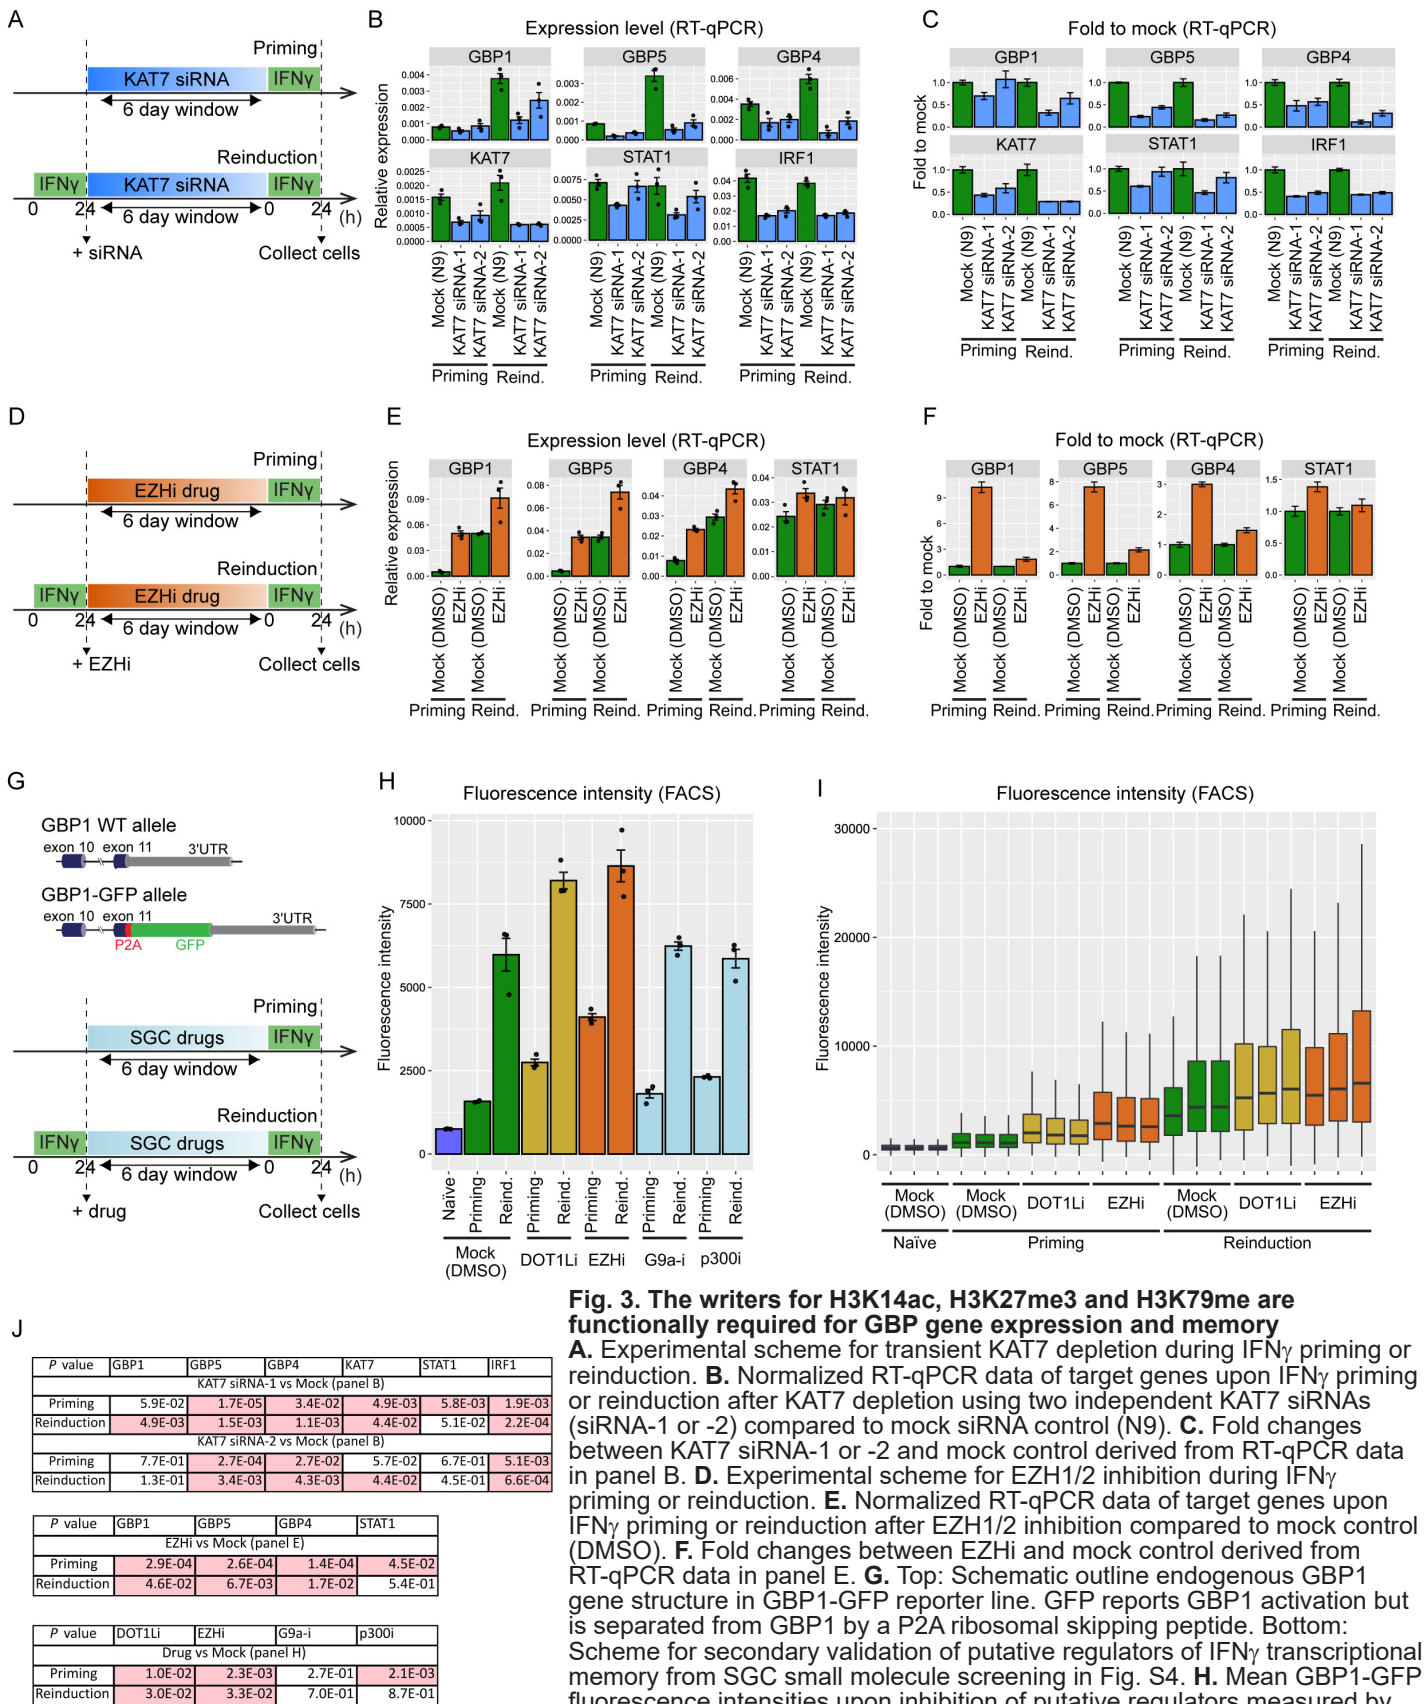

**Fig. 3. The writers for H3K14ac, H3K27me3 and H3K79me are functionally required for GBP gene expression and memory**

**A.** Experimental scheme for transient KAT7 depletion during IFN $\gamma$  priming or reinduction. **B.** Normalized RT-qPCR data of target genes upon IFN $\gamma$  priming or reinduction after KAT7 depletion using two independent KAT7 siRNAs (siRNA-1 or -2) compared to mock siRNA control (N9). **C.** Fold changes between KAT7 siRNA-1 or -2 and mock control derived from RT-qPCR data in panel B. **D.** Experimental scheme for EZH1/2 inhibition during IFN $\gamma$  priming or reinduction. **E.** Normalized RT-qPCR data of target genes upon IFN $\gamma$  priming or reinduction after EZH1/2 inhibition compared to mock control (DMSO). **F.** Fold changes between EZHi and mock control derived from RT-qPCR data in panel E. **G.** Top: Schematic outline endogenous GBP1 gene structure in GBP1-GFP reporter line. GFP reports GBP1 activation but is separated from GBP1 by a P2A ribosomal skipping peptide. Bottom: Scheme for secondary validation of putative regulators of IFN $\gamma$  transcriptional memory from SGC small molecule screening in Fig. S4. **H.** Mean GBP1-GFP fluorescence intensities upon inhibition of putative regulators measured by FACS. Fluorescence is assessed in mock control (DMSO), naive, priming and reinduction conditions. **I.** Experiment shown in H, plotted as boxplots for DOT1Li and EZHi to show individual replicates and signal distribution across the cell population (minimum, 1st quartile, median, 3rd quartile, maximum). **J.** P values for relevant pairwise comparisons of quantifications shown in panels: B, E and H. P values  $\leq 0.05$  are highlighted in red. Statistical significance was calculated with two-sided t-test and prior determination of homo- or heteroscedasticity with F-test. The error bars on all bar plots in the figure correspond to SEM. The black dots on bar plots correspond to individual biological replicates.



Figure 4

A

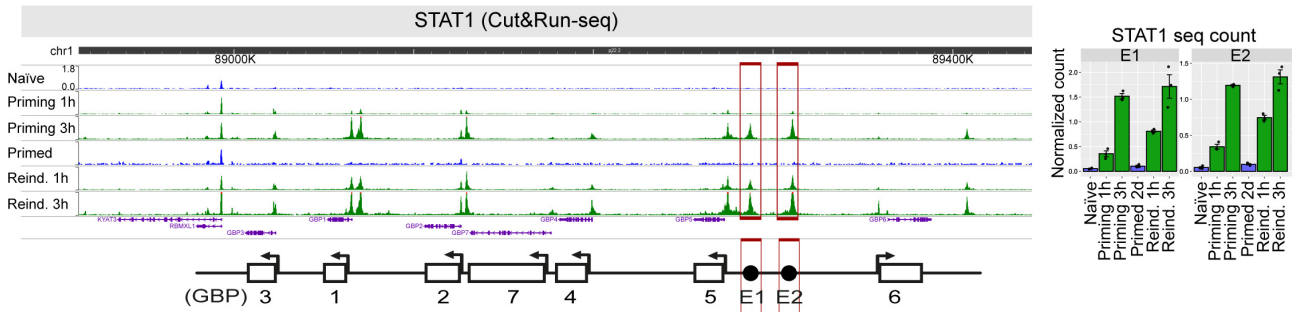

B

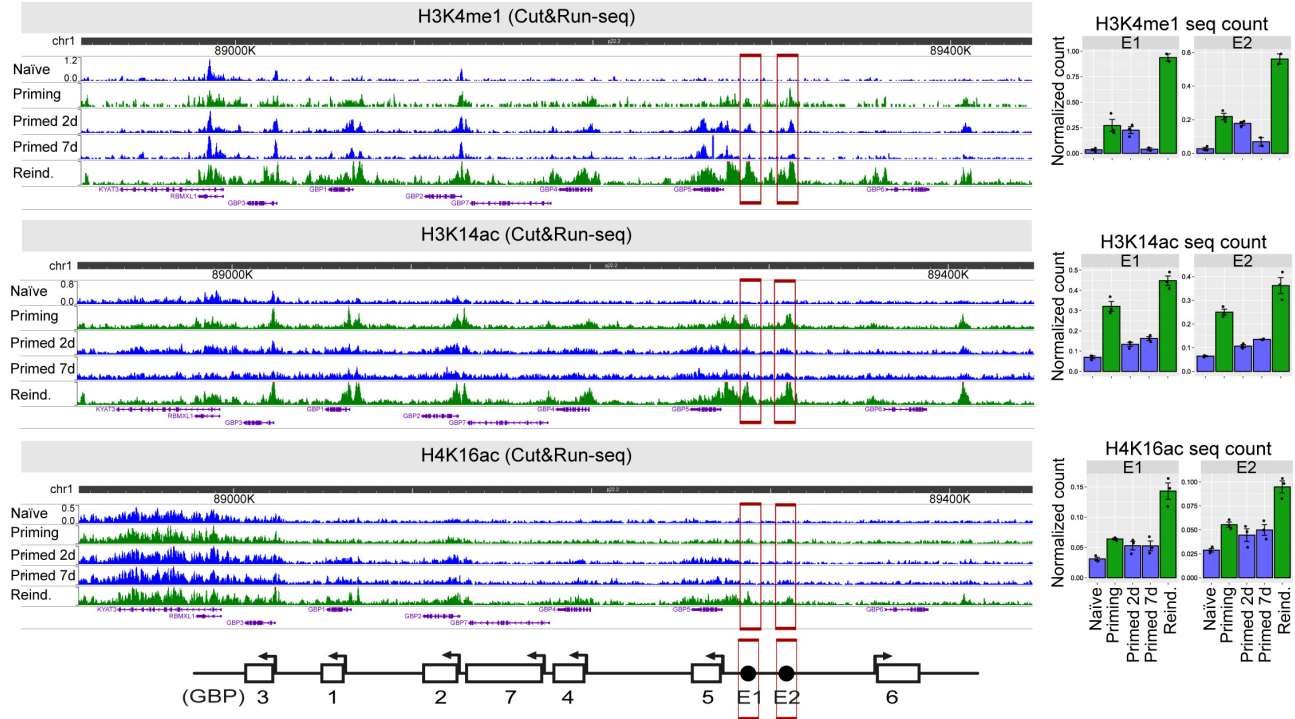

C

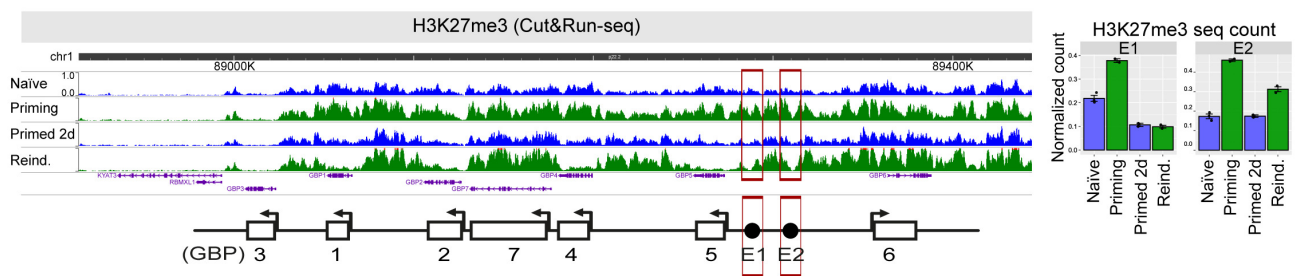

D

| P value                          | E1      | E2      |
|----------------------------------|---------|---------|
| Primed 2d versus Naive (panel B) |         |         |
| H3K4me1                          | 5.3E-03 | 3.1E-04 |
| H3K14ac                          | 6.6E-03 | 2.6E-03 |
| H4K16ac                          | 4.2E-02 | 8.2E-02 |
| Primed 7d versus Naive (panel B) |         |         |
| H3K4me1                          | 3.3E-01 | 1.6E-01 |
| H3K14ac                          | 1.3E-03 | 9.3E-06 |
| H4K16ac                          | 6.3E-02 | 2.2E-02 |
| Primed 2d versus Naive (panel C) |         |         |
| H3K27me3                         | 2.8E-03 | 4.4E-01 |

**Fig. 4. GBP cluster contains uncharacterized, transcription factor-bound cis-regulatory elements with a transcriptional memory chromatin signature.**

**A.** Cut&Run-seq of the IFN $\gamma$ -activated transcription factor STAT1 after 0, 1h and 3h of activation in naive and primed cells. Genome browser snapshots over GBP cluster (left panel) and quantification of normalized Cut&Run sequencing reads over identified cis-regulatory elements (right panel). Data reanalyzed from<sup>10</sup>. **B.** Cut&Run-seq enrichment of active chromatin modifications during IFN $\gamma$ -induced transcriptional memory regime (as shown in Figure 1) represented as genome browser snapshots over GBP cluster (left panel) and quantification of normalized Cut&Run sequencing reads over identified cis-regulatory elements (right panel). **C.** As in B but for the repressive chromatin modification H3K27me3. Red frames on all panels indicate regions used for quantification. **D.** P values for relevant pairwise comparisons of quantifications shown in panels: A, B and C. P values  $\leq 0.05$  are highlighted in red. Statistical significance was calculated with two-sided t-test and prior determination of homo- or heteroscedasticity with F-test. The error bars on all bar plots in the figure correspond to SEM. The black dots on bar plots correspond to individual biological replicates.

Figure 5

A

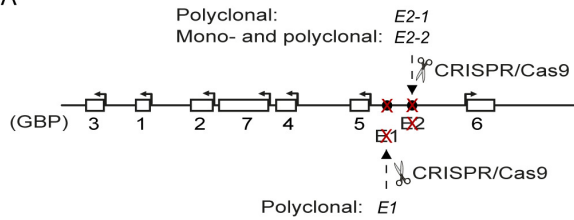

B

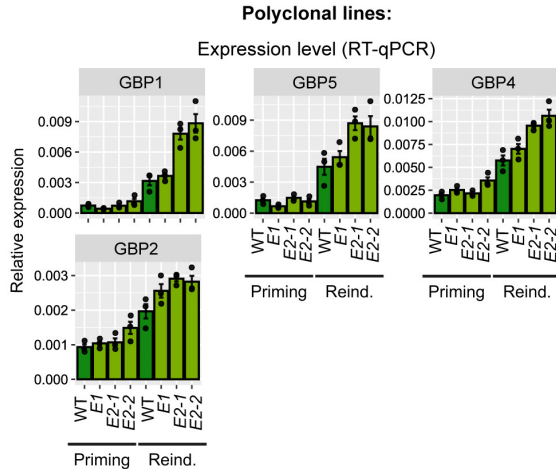

C

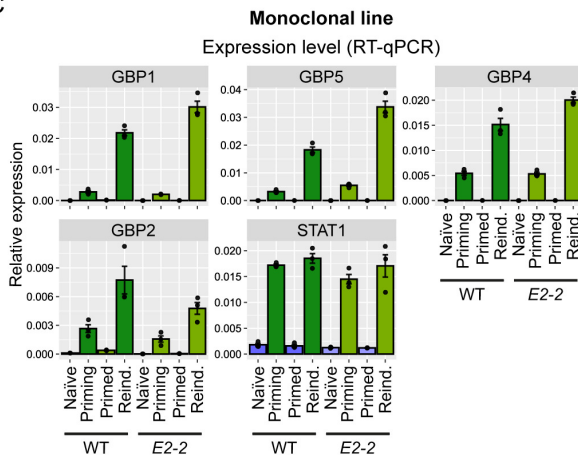

D

| P value                                    | GBP1    | GBP5    | GBP4    | GBP2    |
|--------------------------------------------|---------|---------|---------|---------|
| <i>E1</i> polyclonal versus WT (panel B)   |         |         |         |         |
| Priming                                    | 6.6E-02 | 7.7E-02 | 1.6E-01 | 4.4E-01 |
| Reinduction                                | 4.5E-01 | 4.8E-01 | 2.5E-01 | 1.6E-01 |
| <i>E2-2</i> polyclonal versus WT (panel B) |         |         |         |         |
| Priming                                    | 9.5E-01 | 4.8E-01 | 5.4E-01 | 4.6E-01 |
| Reinduction                                | 6.4E-03 | 2.8E-02 | 6.1E-03 | 2.5E-02 |
| <i>E2-2</i> polyclonal versus WT (panel B) |         |         |         |         |
| Priming                                    | 2.5E-01 | 7.7E-01 | 3.0E-02 | 7.8E-02 |
| Reinduction                                | 1.0E-02 | 6.5E-02 | 1.1E-02 | 5.8E-02 |
| <i>E2-2</i> monoclonal versus WT (panel C) |         |         |         |         |
| Priming                                    | 2.4E-01 | 1.8E-02 | 8.7E-01 | 1.6E-01 |
| Reinduction                                | 3.1E-02 | 5.7E-03 | 4.4E-02 | 2.0E-01 |

**Fig. 5. The E2 cis-regulatory element controls gene repression across the GBP cluster**

**A.** Schematic of GBP gene cluster with indicated CRISPR deletions of E1 and E2, either as polyclonal or monoclonal population. E2-1 and E2-2 indicate two independent deletions generated with distinct gRNAs (see methods). Monoclonal line was isolated from E2-2 polyclonal line by FACS. **B.** Expression of GBP memory genes in wildtype (WT) and polyclonal E1, E2-1, E2-2 deletion lines during IFN $\gamma$  priming or reinduction measured by RT-qPCR. **C.** Expression of GBP memory genes in wildtype (WT) and monoclonal E2-2 deletion line measured by RT-qPCR following IFN $\gamma$ -stimulation regime: naïve, priming, primed and reinduction conditions (as Figure 1A). The error bars on all bar plots in the figure correspond to SEM. The black dots on bar plots correspond to individual biological replicates. **D.** P values for relevant pairwise comparisons of quantifications shown in panels: B and C. P values  $\leq 0.05$  are highlighted in red. Statistical significance was calculated with two-sided t-test and prior determination of homo- or heteroscedasticity with F-test. The error bars on all bar plots in the figure correspond to SEM. The black dots on bar plots correspond to individual biological replicates.

Figure 6

A

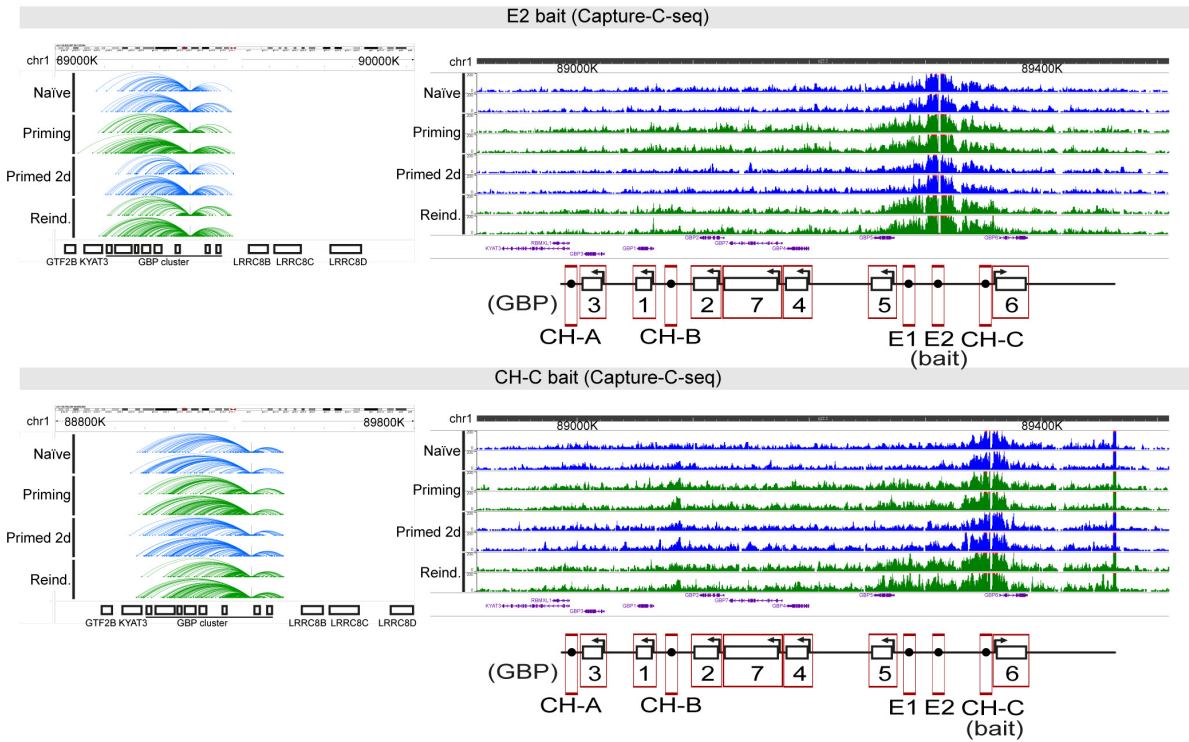

B

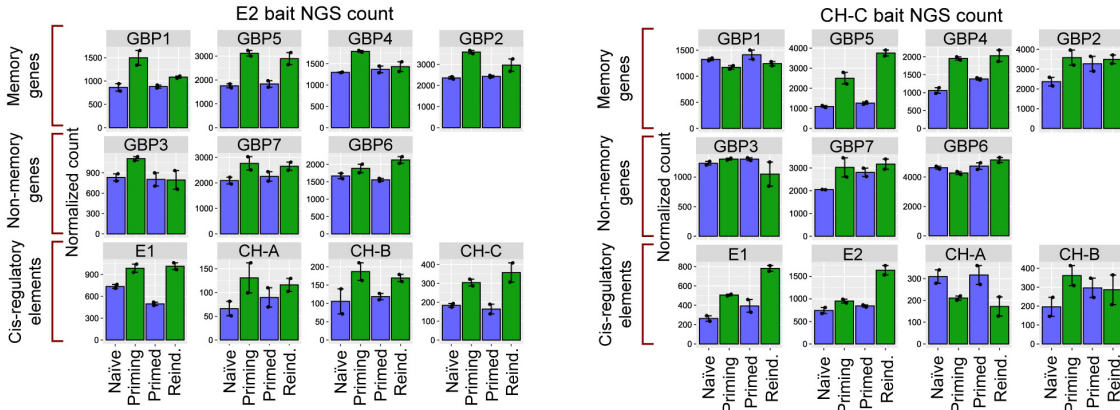

C

| P value                          | GBP1    | GBP5    | GBP4    | GBP2    | GBP3    | GBP7    | GBP6    | enh1    | enh2    | rad21a  | rad21b  | rad21c  |
|----------------------------------|---------|---------|---------|---------|---------|---------|---------|---------|---------|---------|---------|---------|
| Primed 2d versus Naive (panel B) |         |         |         |         |         |         |         |         |         |         |         |         |
| E2 bait                          | 8.5E-01 | 6.6E-01 | 4.7E-01 | 4.6E-01 | 8.1E-01 | 5.4E-01 | 3.4E-01 | 2.1E-02 | 9.4E-01 | 4.5E-01 | 7.5E-01 | 5.5E-01 |
| CH-C bait                        | 4.4E-01 | 1.6E-01 | 6.2E-02 | 1.7E-01 | 2.1E-01 | 5.5E-02 | 7.1E-01 | 2.1E-01 | 2.9E-01 | 9.1E-01 | 3.0E-01 | 7.8E-01 |
| Priming versus Naive (panel B)   |         |         |         |         |         |         |         |         |         |         |         |         |
| E2 bait                          | 6.9E-02 | 1.1E-02 | 2.0E-03 | 6.0E-03 | 4.6E-02 | 1.5E-01 | 2.7E-01 | 5.7E-02 | 5.8E-02 | 2.1E-01 | 1.9E-01 | 2.7E-02 |
| CH-C bait                        | 6.8E-02 | 4.0E-02 | 1.0E-02 | 1.1E-01 | 1.8E-01 | 1.5E-01 | 1.2E-01 | 1.5E-02 | 1.2E-01 | 9.3E-02 | 1.5E-01 | 6.0E-01 |

**Fig. 6. Cis-regulatory elements mediate cluster-wide interactions enhanced during IFN $\gamma$  stimulation**

**A.** Capture-C data showing long-range interactions from element E2 (top panel) or Cohesin site CH-C (bottom panel). The results show zoom-out (left panel) and zoom-in (right panel) genome browser snapshots from normalized Capture-C sequencing reads at and around GBP cluster. Genome browser tracks show 2 biological replicates per condition during IFN $\gamma$ -stimulation regime. Red boxes correspond to the regions used for read quantification and the baits. **B.** Quantification of normalized Capture-C sequencing reads across the GBP cluster: GBP memory genes (GBP1, 4, 5), GBP non-memory genes (GBP3, 6, 7, GBP1P1) and cis-regulatory elements (E1, E2, Cohesin sites (CH-A, CH-B, CH-C)). **C.** P values for relevant pairwise comparisons of quantifications shown in panel B. P values  $\leq 0.05$  are highlighted in red. Statistical significance was calculated with two-sided t-test and prior determination of homo- or heteroscedasticity with F-test. The error bars on all bar plots in the figure correspond to SEM. The black dots on bar plots correspond to individual biological replicates.

Figure 7

A

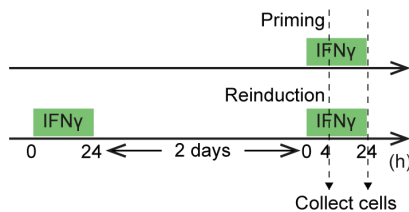

B

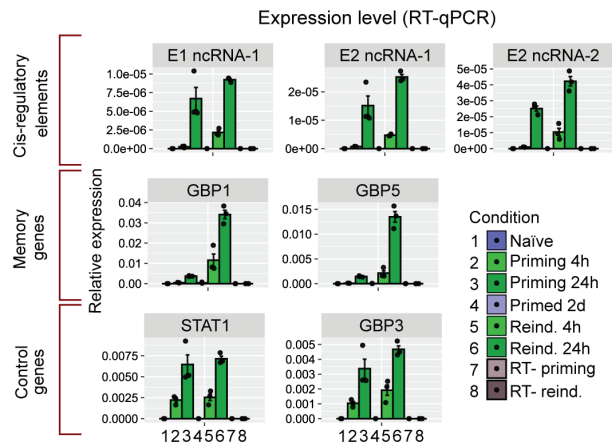

C

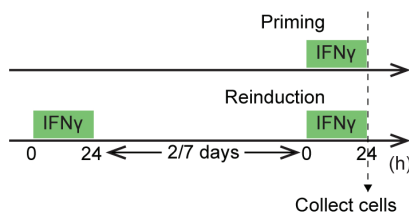

D

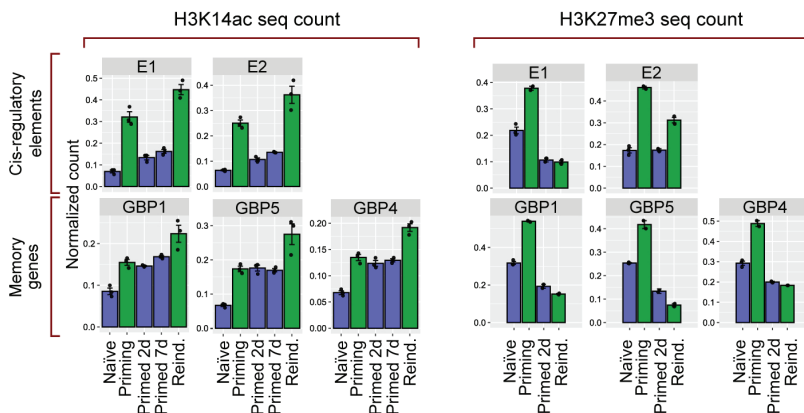

E

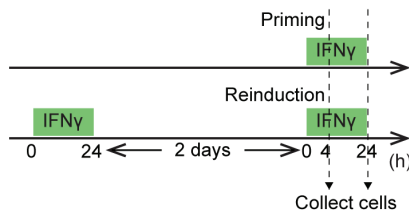

F

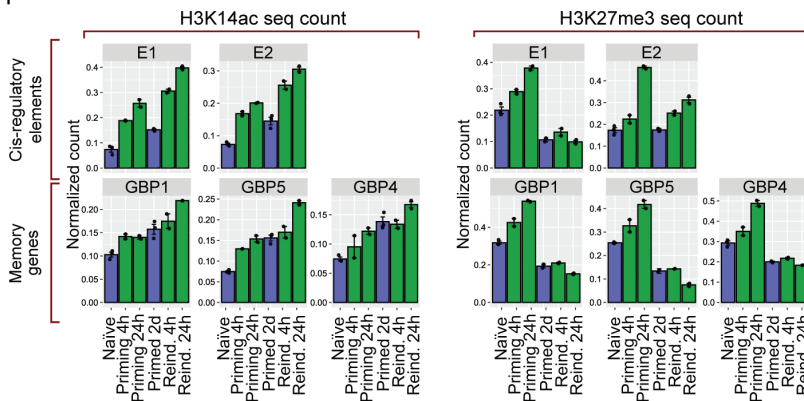

G

| P value                                     | E1 ncRNA-1 | E2 ncRNA-1 | E2 ncRNA-2 |
|---------------------------------------------|------------|------------|------------|
| Reinduction 4h versus Priming 24h (panel B) |            |            |            |
| Expression                                  | 7.3E-02    | 1.3E-01    | 1.4E-02    |
| P value                                     | GBP1       | GBP5       | STAT1      |
| Reinduction 4h versus Priming 24h (panel B) |            |            |            |
| Expression                                  | 1.7E-01    | 3.5E-01    | 5.7E-02    |

| P value                          | E1      | E2      | GBP1    | GBP5    | GBP4    |
|----------------------------------|---------|---------|---------|---------|---------|
| Primed 2d versus Naive (panel D) |         |         |         |         |         |
| H3K14ac                          | 6.6E-03 | 2.6E-03 | 1.5E-03 | 3.1E-04 | 1.1E-03 |
| H3K27me3                         | 2.8E-03 | 4.4E-01 | 5.9E-04 | 1.9E-04 | 1.1E-02 |
| Primed 7d versus Naive (panel D) |         |         |         |         |         |
| H3K14ac                          | 1.3E-03 | 9.3E-06 | 5.5E-04 | 7.1E-05 | 2.0E-04 |
| H3K14ac                          | 1.9E-03 | 4.0E-03 | 1.0E-02 | 4.1E-04 | 1.8E-03 |
| H3K27me3                         | 2.5E-03 | 4.5E-01 | 5.1E-04 | 1.8E-04 | 1.3E-02 |

H

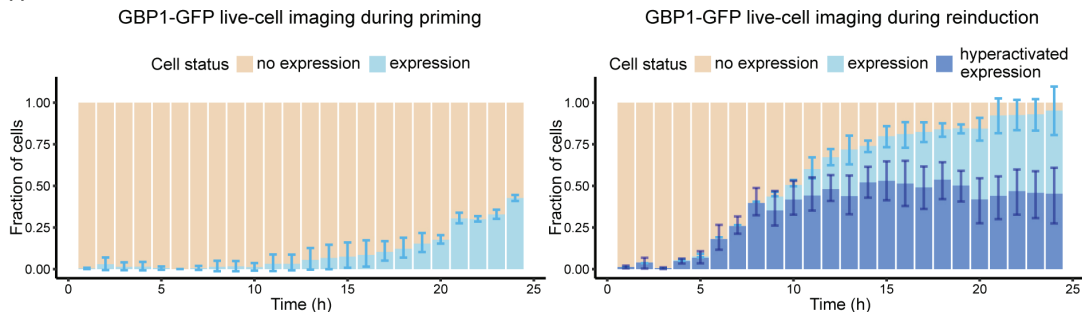

**Fig. 7. Delayed activation of cis-regulatory elements facilitates hyperactivation of GBP memory genes following IFN $\gamma$  priming**

**A.** Experimental transcriptional memory regime outlining timing of IFN $\gamma$ -incubation and cell harvesting. **B.** Expression levels of target loci (cis-regulatory elements, GBP memory genes, control non-memory genes) measured by RT-qPCR following IFN $\gamma$ -stimulation regime: naïve, priming, primed and reinduction conditions. cDNA synthesis negative controls [RT- (no reverse transcriptase)] are included for priming and reinduction conditions. **C.** Experimental transcriptional memory regime outlining timing of IFN $\gamma$ -incubation and cell harvesting. **D.** Comparative quantification of H3K14ac (left panel) and H3K27me3 (right panel) enrichment between cis-regulatory elements and GBP memory genes. The results correspond to Cut&Run sequencing read count presented in Fig. 1, 2 and 4. **E.** Experimental transcriptional memory regime outlining timing of IFN $\gamma$ -incubation and cell harvesting. **F.** Comparative quantification of H3K14ac (left panel) and H3K27me3 (right panel) enrichment between cis-regulatory elements and GBP memory genes in transcriptional memory time course. The results correspond to Cut&Run sequencing read count presented separately in Fig. 2C, D. **G.** P values for relevant pairwise comparisons of quantifications shown in panels: B, D and F. P values  $\leq 0.05$  are highlighted in red. Statistical significance was calculated with two-sided t-test and prior determination of homo- or heteroscedasticity with F-test. The error bars on all bar plots in the figure correspond to SEM. The black dots on bar plots correspond to individual biological replicates. **H.** Time-lapse of live-cell GBP1-GFP protein expression during priming (left) and reinduction (6 days after priming) (right). The fraction of cells with with expression and hyperactivated expression of GBP1-GFP is plotted for each time point. Hyperactivated expression during reinduction is defined as levels above those observed during priming (see methods). The bars represent mean of three replicates. The error bars correspond to SD.

Figure 8

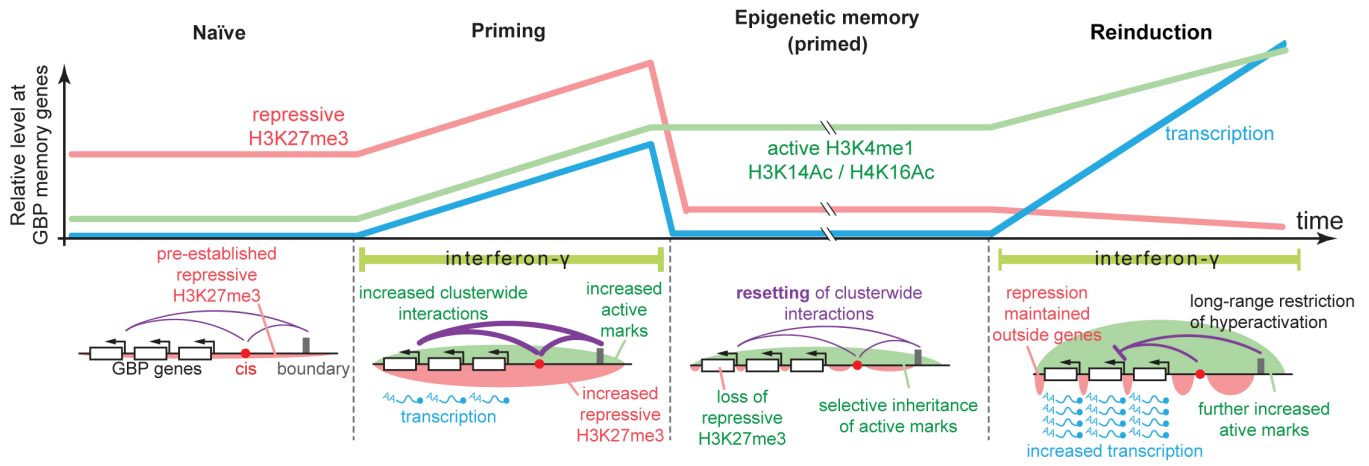

**Fig. 8. Proposed model for IFN $\gamma$ -inducible chromatin-based transcriptional memory at GBP genes.**

The GBP cluster is embedded in a broad domain of low-level repressive H3K27me3 chromatin. IFN $\gamma$  activation results in GBP transcription, and increased long-range interactions between the cis-regulatory elements, cluster boundaries and genes. It further results in establishing activating chromatin in part by KAT7, but also a further elevation of repressive chromatin mediated by PRC2. In the primed state, transcription is lost but active chromatin is selectively retained and mitotically heritable while suppressive H3K27me3 chromatin is locally depleted from GBP genes. This allows rapid and strong reactivation of GBP genes upon re-exposure to IFN $\gamma$ . The cis-regulatory element acts to repress GBPs across the cluster preventing hyperactivation by IFN $\gamma$ .
